# Supplementary material for: Impaired chair-to-bed transfer ability leads to longer hospital stays among elderly patients
Source: BMC Geriatr. 2019 Mar 21;19:89. doi: 10.1186/s12877-019-1104-4 (PMC6427871; doi:10.1186/s12877-019-1104-4)
Supplement: Supplementary file 1 — data bank. The file corresponds to the data bank, including every information’s related to this article. (XLSX 247 kb) [file 12877_2019_1104_MOESM1_ESM.xlsx]

## Sheet: Data
Nº	pront	Sex	Number	Admission data	Discharge data	Length of stay	LPERM	Death	Age	Years of schooling	MOT_INT	Number of diagnosis	Stroke	Chronic obstructive pulmonary disease	Neoplasm	Dialysis	Congestive heart failure	Diabetes	Insanity	Liver disease	AIDS	Coronary failure	Hemoglobin	Number of drugs	Number of hospitalizations	Delirium	Fall	Number of falls	Nutritional risk	Day/month/year	Week day	Place	Telephone number	Age	Birth data	Actual president	Last president	Mother´s name	Count 3/3 (20-1)	Total cognitive score	Personal hygiene last month	Evacuate last month	Urinate last month	Feed last month	Toilet use	Transference last month	Mobilize last month	Wear last month	Stairs last month
1	346688	2	13016683	2014-04-05	2014-04-08	3	0	0	72.1	Superior	infeccioso	2	0	0	0	0	0	0	0	0	0	0	12.2	8	0	0	0	0	1	1	1	1	1	1	1	1	1	1	1	0	5	10	5	10	10	15	15	10	10
2	1576603	2	13020680	2014-04-06	2014-04-09	3	0	0	67.5	Segundo grau	gastroenterológico	1	0	0	0	0	0	0	0	0	0	0	8.7	7	2	0	0	0	0	1	1	1	1	1	1	1	1	1	0	1	5	10	5	10	10	15	15	10	10
3	366838	2	13011228	2014-04-05	2014-04-10	5	0	0	70.4	Superior	ortopédico	1	0	0	0	0	0	0	0	0	0	0	15.3	9	0	0	0	0	1	1	1	1	1	1	1	1	1	1	1	0	5	10	10	10	10	15	15	10	10
4	384286	2	13080714	2014-04-12	2014-04-23	11	0	0	84.1	Superior	infeccioso	5	1	0	0	0	1	1	0	0	0	0	7.8	11	0	1	0	0	1	2	2	2	2	2	2	2	2	2	2		5	0	5	10	10	15	10	10	5
5	1545334	2	13088898	2014-04-14	2014-04-21	7	0	0	70	Superior	neurológico	3	0	0	0	0	0	0	0	0	0	1	12	5	0	0	0	0	1	1	1	1	1	1	1	1	1	1	1	0	5	10	5	10	10	15	15	10	5
6	417335	1	13090885	2014-04-14	2014-04-16	2	0	0	91.1	Segundo grau	neurológico	6	1	0	0	0	0	0	0	0	0	1	12.6	8	0	1	0	0	1	2	2	2	2	2	2	2	2	2	2		5	5	0	5	5	5	10	5	5
7	750659	2	13080877	2014-04-12	2014-04-26	14	0	0	82	Superior	gastroenterológico	4	0	0	1	0	1	0	0	0	0	0	15.2	5	1	0	0	0	1	1	1	1	1	1	1	1	1	1	1	0	5	5	5	10	10	15	15	15	5
8	618664	1	13093346	2014-04-14	2014-07-26	103	1	0	83.1	Segundo grau	infeccioso	6	1	0	0	0	0	0	0	0	0	1	14	15	0	1	0	0	1	2	2	2	2	2	2	2	2	2	2		0	0	0	0	0	0	0	0	0
9	347257	1	13085058	2014-04-13	2014-04-29	16	1	0	92.1	Segundo grau	infeccioso	4	0	0	0	0	1	0	0	0	0	0	12.2	8	0	0	0	0	1	1	1	1	1	1	1	1	1	1	1	0	5	10	10	10	10	10	15	10	10
10	1067883	2	13016127	2014-04-05	2014-04-09	4	0	0	83	Segundo grau	infeccioso	3	0	0	0	0	0	1	0	0	0	0	9.1	6	2	0	0	0	1	1	1	1	1	1	1	1	1	0	0	2	5	5	5	10	10	10	5	5	5
11	452338	2	13014698	2014-04-05	2014-04-25	20	1	0	66	Superior	gastroenterológico	4	0	0	0	0	1	1	0	0	0	0	12.2	5	1	0	0	0	1	1	1	1	1	1	1	1	1	1	1	0	5	10	10	10	10	15	15	10	10
12	1642856	1	12959678	2014-03-31	2014-04-08	8	0	0	72	Superior	cardiovascular	3	0	0	0	0	0	0	0	0	0	1	12.6	4	0	0	0	0	1	1	1	1	1	1	1	1	1	1	0	1	5	10	10	10	10	15	15	5	10
13	857511	2	13007441	2014-04-04	2014-04-09	5	0	0	82	Superior	gastroenterológico	4	0	0	0	0	0	0	0	0	0	1	11	8	0	0	0	0	1	1	1	1	1	1	1	1	1	1	0	1	5	5	5	10	10	15	15	10	5
14	855634	1	12968543	2014-03-31	2014-04-09	9	0	0	86	Segundo grau	oncológico	4	0	0	0	0	0	0	0	0	0	0	9.4	7	1	0	1	1	0	0	0	1	1	1	1	0	1	1	0	4	0	5	5	10	10	10	10	5	5
15	367594	1	13315054	2014-05-11	2014-05-16	5	0	0	83.8	primeiro grau	infeccioso	3	0	0	0	0	0	0	0	0	0	0	13.3	7	3	1	1	2	0	2	2	2	2	2	2	2	2	2	2		0	5	0	0	0	0	0	0	0
16	962912	1	13313086	2014-05-11	2014-05-15	4	0	1	85.3	Segundo grau	infeccioso	6	0	0	0	0	0	0	1	0	0	0	11.2	7	0	1	0	0	0	2	2	2	2	2	2	2	2	2	2		0	0	0	5	5	5	5	5	5
17	1080811	2	13311799	2014-05-10	2014-05-13	3	0	0	63.4	Segundo grau	infeccioso	3	0	0	0	0	0	0	0	0	0	0	13.4	9	1	0	0	0	1	1	1	1	1	1	1	1	1	1	0	1	5	5	5	10	10	15	15	5	5
18	725747	2	13292204	2014-05-10	2014-05-16	6	0	0	76.7	Superior	neurológico	13	0	0	0	0	0	1	0	0	0	0	13.1	13	1	0	1	1	1	1	1	1	1	1	1	1	1	1	1	0	0	5	10	10	5	5	10	5	5
19	1246298	2	13310506	2014-05-10	2014-05-13	3	0	0	77.5	Superior	neurológico	6	1	0	0	1	0	1	0	0	0	0	10.1	13	0	0	0	0	1	1	1	1	1	1	1	1	1	1	1	0	5	10	10	10	10	15	15	10	10
20	1114494	2	13307689	2014-05-10	2014-05-14	4	0	0	86.4	Segundo grau	infeccioso	6	0	0	0	0	0	1	0	0	0	0	12.6	8	0	0	0	0	1	0	0	1	0	1	1	1	1	1	0	4	5	5	5	10	10	15	15	10	5
21	999726	2	13309111	2014-05-10	2014-05-25	15	1	0	60.5	Segundo grau	infeccioso	2	0	0	0	0	0	1	0	0	0	0	12.3	3	3	1	0	0	1	2	2	2	2	2	2	2	2	2	2		0	5	0	5	0	5	0	5	0
22	745853	1	13310475	2014-05-10	2014-05-18	8	0	0	65.8	Superior	infeccioso	3	0	0	0	0	0	0	0	0	0	0	14	2	0	0	0	0	0	1	1	1	1	1	1	1	1	1	1	0	5	10	10	10	10	15	15	10	10
23	1004946	2	13186074	2014-04-25	2014-05-01	6	0	0	75.7	Superior	infeccioso	1	0	0	0	0	0	0	0	0	0	0	15.3	6	0	0	0	0	1	0	0	0	0	1	1	1	1	0	0	6	5	5	5	10	10	15	15	10	10
24	1638614	2	13168169	2014-04-26	2014-04-28	2	0	0	61.9	Superior	oncológico	2	0	0	0	0	0	0	0	0	0	0	11.2	1	1	0	0	0	0	1	1	1	1	1	1	1	1	1	1	0	5	10	10	10	10	15	15	10	10
25	1056388	2	13136363	2014-04-20	2014-04-30	10	0	0	60.1	Segundo grau	infeccioso	3	0	0	0	0	0	1	0	0	0	0	10.2	6	0	0	0	0	1	1	1	1	1	1	1	1	1	1	1	0	5	5	10	10	10	15	15	10	10
26	444888	1	13133841	2014-04-19	2014-04-25	6	0	0	83.5	Segundo grau	infeccioso	2	0	0	0	0	0	0	0	0	0	0	11.2	4	1	0	0	0	0	1	1	1	1	1	1	1	1	1	0	1	5	5	10	10	10	15	15	10	10
27	479481	2	13133259	2014-04-19	2014-04-26	7	0	0	84.6	Segundo grau	cardiovascular	5	0	0	0	0	1	1	0	0	0	0	8.5	26	3	0	0	0	1	1	1	1	1	1	1	1	1	1	0	1	0	5	0	5	5	10	10	5	5
28	305053	1	13139147	2014-04-21	2014-04-24	3	0	0	78.5	Superior	oncológico	3	0	0	0	0	0	0	0	0	0	0	13.6	8	0	0	0	0	1	1	1	1	1	1	1	1	1	1	1	0	5	10	10	10	10	15	15	10	10
29	1470214	2	13141413	2014-04-21	2014-04-24	3	0	0	61.1	Superior	cardiovascular	5	0	0	0	0	0	1	0	0	0	0	13.1	12	0	0	0	0	1	1	1	1	1	1	1	1	1	1	1	0	5	10	5	10	10	15	15	10	10
30	1028612	1	13094405	2014-04-14	2014-04-17	3	0	0	92	Segundo grau	infeccioso	5	0	0	0	0	0	0	0	0	0	0	12.4	9	0	1	0	0	1	2	2	2	2	2	2	2	2	2	2		0	0	0	5	0	5	5	0	5
31	386849	1	13096021	2014-04-14	2014-04-17	3	0	0	71	Superior	neurológico	1	0	0	0	0	0	0	0	0	0	0	11.5	6	1	0	0	0	0	1	1	1	1	1	1	1	1	1	1	0	5	10	10	10	0	15	15	10	10
32	496572	2	13089563	2014-04-14	2014-04-18	4	0	0	85.6	Segundo grau	infeccioso	4	0	0	0	0	0	0	0	0	0	0	12.1	7	0	1	0	0	1	0	0	0	0	1	1	0	0	0	0	8	0	5	0	5	5	10	10	5	5
33	524064	2	13095963	2014-04-14	2014-04-17	3	0	0	84.9	Superior	infeccioso	5	0	0	0	0	0	0	0	0	0	0	12	13	0	1	0	0	1	1	1	1	0	1	1	0	0	1	0	4	0	5	5	5	5	5	15	5	5
34	457284	2	13025698	2014-04-07	2014-04-13	6	0	0	66.7	Superior	oncológico	5	0	0	1	0	0	0	0	0	0	0	13.2	5	1	1	0	0	1	1	1	1	1	1	1	1	1	1	1	0	0	0	5	5	5	5	5	5	5
35	371741	1	13037269	2014-04-08	2014-05-10	32	1	0	77.5	Segundo grau	ortopédico	4	0	0	0	0	0	1	0	0	0	0	11.5	7	2	0	1	1	1	1	1	1	0	1	1	0	0	0	0	5	0	0	0	10	0	5	5	5	0
36	1605735	2	13030678	2014-04-07	2014-04-16	9	0	0	71.3	Superior	neurológico	4	0	0	0	0	0	0	0	0	0	0	9.8	9	1	1	0	0	1	0	1	0	1	1	1	0	1	0	0	5	0	5	5	5	0	5	5	10	5
37	398723	1	12998218	2014-04-07	2014-04-11	4	0	0	68.5	Superior	ortopédico	3	0	0	0	0	0	0	0	0	0	0	11.2	7	1	0	0	0	1	1	1	1	1	1	1	1	1	1	1	0	5	10	10	10	10	15	15	10	10
38	1010070	1	13025102	2014-04-07	2014-04-19	12	0	0	63.7	Segundo grau	ortopédico	4	0	0	0	0	1	0	0	0	0	0	12.3	8	1	1	1	2	1	2	2	2	2	2	2	2	2	2	2		0	5	5	10	0	5	10	5	5
39	369460	1	13030852	2014-04-07	2014-04-10	3	0	0	75.3	Segundo grau	ortopédico	2	0	0	0	0	0	0	0	0	0	0	12.1	4	0	0	1	3	1	1	1	1	1	1	1	0	1	1	0	2	5	5	5	10	10	10	10	10	5
40	1164505	2	13028350	2014-04-07	2014-04-09	2	0	0	62.7	Superior	ortopédico	3	0	0	0	0	0	0	0	0	0	0	14.8	3	0	0	0	0	0	1	1	1	1	1	1	1	1	1	1	0	5	10	5	10	10	15	15	10	10
41	894241	1	13029349	2014-04-08	2014-04-10	2	0	0	79.1	Superior	ortopédico	1	0	0	0	0	0	0	0	0	0	0	12.3	1	0	0	0	0	0	1	1	1	1	1	1	1	1	1	1	0	5	5	5	10	10	15	15	10	10
42	1693448	2	12968945	2014-03-31	2014-04-24	24	1	0	65.4	Superior	oncológico	1	0	0	0	0	0	1	0	0	0	0	11	4	2	0	0	0	0	1	1	1	1	1	1	1	1	1	1	0	5	10	5	10	10	15	15	5	10
43	409275	2	12954529	2014-03-30	2014-04-07	8	0	0	61.2	Superior	infeccioso	5	0	0	0	0	0	1	0	0	0	0	8.2	7	0	0	0	0	1	1	1	1	1	1	1	1	1	1	1	0	5	10	10	10	10	15	15	10	10
44	531350	2	12950452	2014-03-29	2014-05-23	55	1	1	94	Superior	infeccioso	5	0	0	1	0	0	0	1	0	0	0	12.5	3	2	1	1	1	1	2	2	2	2	2	2	2	2	2	2		0	0	0	5	0	5	10	5	0
45	724189	1	12952179	2014-03-29	2014-04-03	5	0	0	79	Segundo grau	gastroenterológico	2	0	0	0	0	0	0	0	0	0	0	11	4	0	0	0	0	1	1	1	1	1	1	1	1	1	1	0	1	5	10	10	10	10	15	15	10	10
46	1672151	2	12947625	2014-03-29	2014-04-20	22	1	0	72.3	Superior	cardiovascular	4	0	0	1	0	0	0	1	0	0	0	11.3	3	1	1	0	0	1	0	1	0	0	0	1	1	1	1	0	5	0	10	5	10	10	5	15	10	10
47	376423	1	12944532	2014-03-28	2014-04-01	4	0	0	81.2	Segundo grau	infeccioso	4	1	0	0	0	0	1	0	0	0	0	13.2	8	0	1	0	0	1	2	2	2	2	2	2	2	2	2	2		0	0	0	0	0	0	0	0	0
48	320673	1	12869892	2014-03-05	2014-03-26	21	1	0	72.6	primeiro grau	gastroenterológico	3	0	0	0	0	0	0	0	0	0	0	12.2	5	0	0	0	0	1	1	1	1	1	1	1	1	1	1	0	1	5	10	10	10	10	15	15	10	10
49	1289887	2	12900147	2014-03-24	2014-03-30	6	0	0	68.3	Superior	gastroenterológico	2	0	0	0	0	0	0	0	0	0	0	7.4	5	3	1	0	0	1	2	2	2	2	2	2	2	2	2	2		0	5	5	5	0	5	10	5	5
50	1480294	1	12968412	2014-03-31	2014-04-12	12	0	0	109	Superior	infeccioso	3	0	0	0	0	0	0	0	0	0	0	12.6	9	0	0	0	0	1	1	1	1	1	1	1	1	1	1	1	0	5	10	10	10	10	5	15	0	10
51	600279	1	12970266	2014-04-03	2014-04-07	4	0	0	85.3	Segundo grau	cardiovascular	3	0	0	0	0	0	0	0	0	0	1	13.4	2	1	0	0	0	1	1	1	1	1	1	1	1	1	1	0	1	5	10	5	10	10	10	15	0	10
52	907486	2	12958606	2014-03-31	2014-04-02	2	0	0	75.5	Superior	cardiovascular	2	1	0	0	0	1	0	0	0	0	0	13.7	4	1	1	1	1	1	2	2	2	2	2	2	2	2	2	2		0	5	5	5	10	10	5	5	0
53	363527	2	12957462	2014-03-30	2014-04-13	14	0	0	88.5	Superior	infeccioso	4	0	0	0	0	0	1	0	0	0	0	11.3	9	1	0	0	0	1	1	1	1	1	1	1	1	1	1	0	1	5	5	5	5	5	10	10	0	5
54	1711816	2	13465345	2014-05-31	2014-06-12	12	0	0	64.2	Superior	oncológico	2	0	0	1	0	1	0	0	0	0	0	13.7	4	0	0	0	0	1	1	1	1	1	1	1	1	1	1	1	0	5	10	10	10	10	15	15	10	10
55	389157	1	13502429	2014-05-31	2014-06-03	3	0	0	-10	Segundo grau	cardiovascular	4	0	0	0	1	0	0	0	0	0	0	13.7	4	1	1	1	1	1	2	2	2	2	2	2	2	2	2	2		0	5	0	5	0	5	5	0	5
56	542975	2	13502764	2014-05-31	2014-06-05	5	0	0	64	Superior	neurológico	4	0	0	0	0	0	1	0	0	0	0	12.8	9	1	0	0	0	1	1	1	1	1	1	1	1	1	1	1	0	5	10	10	10	10	15	15	10	10
57	1463382	1	13505250	2014-06-01	2014-06-08	7	0	0	89.7	Segundo grau	neurológico	4	0	0	0	0	1	0	0	0	0	0	14	9	2	0	1	1	1	1	1	1	1	1	1	1	1	1	1	0	0	0	0	5	0	5	10	0	0
58	485790	1	13340905	2014-05-30	2014-06-07	8	0	0	85.7	Primeiro garu	ortopédico	2	0	0	0	0	1	0	0	0	0	0	10	13	1	0	1	2	1	1	1	1	1	1	1	1	1	1	0	1	5	10	5	10	5	5	10	5	5
59	483978	1	13489869	2014-05-30	2014-06-05	6	0	0	68.7	Primeiro garu	ortopédico	2	0	0	0	0	0	0	0	0	0	0	8.4	6	1	0	1	1	1	1	1	1	1	1	1	1	1	1	0	1	0	5	10	5	5	15	15	10	10
60	367923	2	13428557	2014-05-30	2014-06-02	3	0	0	64.3	Superior	ortopédico	2	0	0	0	0	0	0	0	0	0	0	13.2	2	0	0	0	0	0	1	1	1	1	1	1	1	1	1	1	0	5	10	10	10	10	15	15	10	10
61	1200474	2	13502437	2014-05-31	2014-06-02	2	0	0	74.4	Superior	ortopédico	3	0	0	0	0	0	0	0	0	0	0	12.3	2	0	0	0	0	0	1	1	1	1	1	1	1	1	1	1	0	0	10	10	10	10	15	15	10	10
62	1465534	1	13459528	2014-05-27	2014-05-29	2	0	0	69.8	Segundo grau	gastroenterológico	5	0	0	0	0	0	0	0	0	0	0	12.4	8	0	0	0	0	1	1	1	1	1	1	1	1	1	1	1	0	5	10	10	10	10	15	15	10	10
63	1344860	2	13439346	2014-05-25	2014-06-10	16	1	0	79.2	Segundo grau	gastroenterológico	3	0	0	1	0	0	0	0	1	0	1	8.4	5	1	1	1	2	1	2	2	2	2	2	2	2	2	2	2		0	5	5	10	5	5	10	5	5
64	850941	2	13457136	2014-05-27	2014-05-30	3	0	0	87.5	Segundo grau	gastroenterológico	4	0	0	0	0	1	1	0	0	0	0	9.9	12	1	1	0	0	1	2	2	2	2	2	2	2	2	2	2		0	5	0	0	0	0	0	0	0
65	1708682	2	13466117	2014-05-28	2014-05-29	1	0	0	79.4	Segundo grau	gastroenterológico	2	0	0	0	0	0	0	0	0	0	0	12.1	6	1	0	0	0	0	1	1	1	1	1	1	1	1	0	0	2	5	5	10	10	10	15	15	10	10
66	728023	1	13456922	2014-05-27	2014-05-29	2	0	0	65.2	Superior	gastroenterológico	3	0	0	1	0	0	0	0	0	0	0	13.5	4	1	0	0	0	0	1	1	1	1	1	1	1	1	1	1	0	5	5	10	10	10	15	15	10	10
67	540569	1	13451037	2014-05-27	2014-05-28	1	0	0	76.5	Segundo grau	gastroenterológico	1	0	0	0	0	0	0	0	0	0	0	13.2	5	0	0	0	0	0	1	1	1	1	1	1	1	1	1	1	0	5	10	10	10	10	15	15	10	10
68	301132	1	13449375	2014-05-26	2014-05-29	3	0	0	72	Superior	nefrológico	4	0	0	0	0	1	1	0	1	0	0	13.1	9	1	0	0	0	1	1	1	1	1	1	1	1	1	1	1	0	5	10	10	10	10	15	15	10	10
69	384144	2	13618260	2014-06-13	2014-06-16	3	0	0	75.5	Superior	neurológico	5	0	0	0	0	0	0	0	0	0	0	13.3	9	2	0	1	1	1	1	1	1	1	1	1	1	1	1	1	0	5	5	5	10	10	15	15	10	10
70	590701	1	13432254	2014-05-24	2014-05-30	6	0	1	99.3	Segundo grau	gastroenterológico	3	0	0	0	0	0	1	1	0	0	0	15.2	5	1	1	0	0	1	2	2	2	2	2	2	2	2	2	2		0	0	0	0	0	0	0	0	0
71	579635	1	13398890	2014-05-24	2014-05-26	2	0	0	77.8	Superior	cardiovascular	4	0	0	1	0	0	0	0	0	0	1	14	9	0	0	0		0	1	1	1	1	1	1	1	1	1	1	0	5	10	10	10	10	15	15	10	10
72	326634	2	13433762	2014-05-24	2014-06-08	15	1	1	91.9	Segundo grau	cardiovascular	5	0	0	0	0	1	1	0	0	0	1	16.2	5	1	1	1	2	1	2	2	2	2	2	2	2	2	2	2		0	5	0	5	0	5	5	5	0
73	474036	2	13436130	2014-05-24	2014-05-26	2	0	0	78.2	Superior	cardiovascular	3	0	0	0	0	1	1	0	0	0	0	12.8	6	0	0	0	0	1	1	1	1	1	1	1	1	1	1	0	1	0	10	10	10	5	5	10	10	5
74	421596	2	13430799	2014-05-23	2014-07-28	66	1	1	88.4	Segundo grau	cardiovascular	4	0	0	0	0	1	1	0	0	0	1	11.7	7	1	0	1	2	1	0	0	1	1	1	1	1	1	1	0	3	5	10	5	10	10	15	10	10	10
75	980845	2	13440880	2014-05-25	2014-06-01	7	0	0	80.1	Superior	cardiovascular	4	0	0	1	0	1	0	0	0	0	1	12.7	4	0	0	1	1	1	1	1	1	1	1	1	1	1	1	1	0	5	10	10	10	10	15	15	10	10
76	725170	2	13443565	2014-05-26	2014-05-30	4	0	0	83.5	Superior	neurológico	3	0	0	1	0	0	0	0	0	0	0	13.3	3	0	0	0	0	1	1	1	1	1	1	1	1	1	1	1	0	5	10	5	10	10	15	15	10	10
77	492659	1	13441288	2014-05-25	2014-05-29	4	0	0	88.3	Segundo grau	infeccioso	4	0	0	0	0	1	0	0	0	0	0	12.3	4	0	0	0	0	0	1	1	1	1	1	1	1	1	1	1	0	5	5	5	10	10	15	15	10	5
78	733974	2	13440234	2014-05-25	2014-05-28	3	0	0	86.5	Segundo grau	cardiovascular	3	0	0	0	0	0	1	0	0	0	0	11.8	7	2	1	0	0	1	2	2	2	2	2	2	2	2	2	2		0	0	0	0	0	0	0	0	0
79	1178100	1	13450820	2014-05-26	2014-05-30	4	0	0	88.6	Superior	gastroenterológico	3	0	0	1	0	0	0	0	0	0	1	10.5	2	0	0	0	0	1	1	1	1	1	1	1	1	1	1	0	1	5	0	5	10	10	15	15	10	10
80	1043890	1	13479616	2014-06-02	2014-06-06	4	0	0	74.8	Superior	gastroenterológico	2	0	0	1	0	1	0	0	0	0	0	9.8	3	0	0	0	0	1	1	1	1	1	1	1	1	1	1	0	1	5	5	10	10	10	15	15	10	5
81	1438448	2	13529854	2014-06-03	2014-06-06	3	0	0	79.8	Segundo grau	neurológico	1	0	0	0	0	0	0	0	0	0	0	12.8	1	1	1	1	2	1	2	2	2	2	2	2	2	2	2	2		0	0	0	5	0	0	0	0	0
82	488697	1	13539226	2014-06-04	2014-06-09	5	0	0	78.3	Superior	gastroenterológico	3	0	0	0	0	0	0	0	0	0	0	16.8	8	0	0	0	0	0	1	1	1	1	1	1	1	1	1	1	0	5	10	10	10	10	15	15	10	10
83	334564	2	13510391	2014-06-03	2014-06-08	5	0	0	76.8	Superior	gastroenterológico	5	0	0	1	0	0	1	0	0	0	0	12.3	9	1	0	0	0	1	1	1	1	1	1	1	1	1	1	1	0	0	10	10	10	10	15	15	10	10
84	722629	2	13528836	2014-06-03	2014-06-07	4	0	0	82.6	Superior	gastroenterológico	2	0	1	0	0	0	0	0	0	0	0	14.7	3	1	0	0	0	0	1	1	1	1	1	1	1	1	1	1	0	5	0	10	5	10	15	15	10	5
85	1016710	1	13516542	2014-06-02	2014-06-14	12	0	0	63.8	Segundo grau	neurológico	2	0	0	0	0	0	0	0	0	0	0	9.6	1	0	0	1	1	0	1	1	1	1	1	1	1	1	1	0	1	5	10	10	10	10	15	15	10	10
86	545142	2	13564145	2014-06-07	2014-06-13	6	0	0	81.2	Superior	neurológico	2	0	0	0	0	0	1	0	0	0	0	11.3	1	2	1	1	1	1	2	2	2	2	2	2	2	2	2	2		0	10	10	5	10	10	10	5	5
87	358840	1	13564751	2014-06-07	2014-06-19	12	0	0	87.1	Superior	neurológico	2	0	0	1	0	0	0	1	0	0	0	14	4	0	1	0	0	1	2	2	2	2	2	2	2	2	2	2		0	5	5	5	0	10	10	5	0
88	1574342	2	13554857	2014-06-06	2014-08-01	56	1	0	63.3	Superior	neurológico	2	0	0	0	0	0	0	0	0	0	0	13.1	2	1	1	0	0	1	2	2	2	2	2	2	2	2	2	2		0	10	5	10	10	10	15	10	5
89	434853	1	13589926	2014-06-13	2014-06-16	3	0	0	68.3	Superior	oncológico	2	0	0	1	0	0	0	0	0	0	1	11.1	4	0	0	0	0	0	1	1	1	1	1	1	1	1	0	1	1	5	10	10	10	10	15	15	10	10
90	964321	2	13627529	2014-06-15	2014-07-04	19	1	0	70.1	Superior	oncológico	4	1	0	0	0	0	1	0	0	0	0	12	6	0	1	1	1	1	2	2	2	2	2	2	2	2	2	2		0	0	0	10	5	10	15	10	10
91	721068	2	13627718	2014-06-15	2014-06-22	7	0	0	78.7	Segundo grau	gastroenterológico	4	0	0	0	0	0	1	0	0	0	1	10.3	9	1	1	0	0	1	2	2	2	2	2	2	2	2	2	2		0	10	10	10	10	10	15	10	10
92	498758	1	13623714	2014-06-14	2014-06-17	3	0	0	75.7	Superior	gastroenterológico	2	0	0	1	0	0	0	0	0	0	0	13.8	5	1	0	1	3	1	1	1	1	1	1	1	1	1	1	1	0	5	5	10	10	10	10	10	10	5
93	997878	2	13572632	2014-06-09	2014-06-11	2	0	0	70.1	Superior	cardiovascular	3	0	0	0	0	1	0	0	0	0	0	12.7	6	0	0	0	0	0	1	1	1	1	1	1	1	1	1	1	0	5	10	10	10	10	15	15	10	10
94	571854	1	13576773	2014-06-09	2014-06-14	5	0	0	62.2	Segundo grau	ortopédico	2	0	0	1	0	0	1	0	0	0	0	11.7	9	0	0	0	0	1	1	1	1	1	1	1	1	1	1	1	0	5	10	10	10	10	15	15	10	10
95	1342975	2	1342975	2014-06-08	2014-06-13	5	0	0	67.7	Superior	infeccioso	2	0	0	0	0	0	1	0	0	0	0	13.7	4	1	0	0	0	1	1	1	1	1	1	1	1	1	1	1	0	5	10	5	10	10	15	15	10	10
96	517952	2	13568214	2014-06-08	2014-06-12	4	0	0	70.3	Superior	gastroenterológico	4	0	0	0	0	0	1	0	0	0	1	8.9	8	0	0	0	0	1	1	1	1	1	1	1	1	1	1	1	0	5	10	10	10	10	15	15	10	10
97	463888	1	13568456	2014-06-08	2014-06-14	6	0	0	88.2	Segundo grau	gastroenterológico	3	0	0	0	0	0	1	0	0	0	1	8.9	7	0	0	1	2	1	1	1	1	1	1	1	1	1	1	0	1	5	5	10	10	15	15	10	10	10
98	1211421	2	13567549	2014-06-08	2014-06-11	3	0	0	69.9	Superior	gastroenterológico	3	0	0	1	0	0	0	0	1	0	0	8	1	0	0	0	0	1	1	1	1	1	1	1	1	1	1	1	0	5	5	10	10	10	15	15	10	10
99	805225	2	13577557	2014-06-09	2014-06-14	5	0	0	80.6	Segundo grau	gastroenterológico	2	0	0	1	0	0	0	1	0	0	0	12.9	11	0	0	0	0	1	2	2	2	2	2	2	2	2	2	2		5	5	5	10	10	15	15	10	10
100	542740	2	13564459	2014-06-07	2014-06-14	7	0	0	90	Segundo grau	neurológico	3	0	0	0	0	1	1	0	0	0	0	9.5	9	1	0	1	1	1	1	0	1	1	1	1	1	1	1	0	2	5	5	10	10	10	15	15	10	10
101	1007616	2	13562337	2014-06-07	2014-06-21	14	0	0	83.5	Superior	infeccioso	3	1	0	0	0	0	1	1	0	0	0	9.7	7	1	0	0	0	1	2	2	2	2	2	2	2	2	2	2		0	5	0	5	0	5	5	5	5
102	350963	2	13570061	2014-06-08	2014-06-11	3	0	0	91.7	Segundo grau	neurológico	2	0	0	0	0	1	0	0	0	0	0	11.7	1	0	0	1	2	0	1	1	1	1	1	1	1	1	1	0	1	5	10	10	10	10	15	15	10	10
103	718857	1	13568696	2014-06-08	2014-06-11	3	0	0	91.6	Segundo grau	neurológico	2	1	1	1	1	0	0	0	0	0	1	14.4	8	1	1	0	0	1	2	2	2	2	2	2	2	2	2	2		0	0	0	5	5	5	5	5	5
104	553007	2	13439943	2014-05-25	2014-05-28	3	0	0	81.9	Superior	neurológico	3	0	0	1	0	0	0	0	0	0	1	13.6	4	0	0	0	0	1	1	1	1	1	1	1	1	1	1	1	0	5	5	10	10	10	15	15	10	10
105	1250148	2	14736187	2014-10-19	2014-10-21	2	0	0	85.1	Superior	infeccioso	4	1	0	0	0	0	1	1	0	0	0	12.2	7	0	0	0	0	0	2	2	2	2	2	2	2	2	2	2		5	0	0	5	5	10	5	5	0
106	1487191	2	14749325	2014-10-20	2014-11-06	17	1	0	86.5	Segundo grau	gastroenterológico	4	0	0	0	0	0	1	0	0	0	0	9.8	8	3	0	0	0	1	1	1	1	1	1	1	1	0	1	0	2	0	0	0	0	0	0	10	0	0
107	928434	1	14738357	2014-10-20	2014-10-21	1	0	0	88.3	Segundo grau	neurológico	3	1	0	0	0	0	1	1	0	0	0	11.9	9	2	1	0	0	1	2	2	2	2	2	2	2	2	2	2		5	10	10	5	5	5	10	5	5
108	1132371	1	14748671	2014-10-20	2014-10-23	3	0	0	85.6	Segundo grau	infeccioso	3	0	0	0	0	0	0	0	0	0	0	12.5	4	2	0	0	0	0	1	1	1	1	1	1	1	1	1	1	0	5	10	10	10	10	15	15	10	10
109	498580	1	14732913	2014-10-18	2014-10-20	2	0	0	73.6	Superior	neurológico	5	0	0	0	0	0	1	0	0	0	0	14.6	4	0	0	0	0	1	1	1	1	1	1	1	1	1	1	1	0	5	10	10	10	10	15	15	10	10
110	569152	1	14723362	2014-10-17	2014-10-21	4	0	0	63.6	Superior	nefrológico	4	0	0	0	0	0	1	0	0	0	0	13.6	4	0	0	0	0	1	1	1	1	1	1	1	1	1	1	1	0	5	10	10	10	10	15	15	10	10
111	1737537	2	14737043	2014-10-19	2014-10-28	9	0	0	77.4	Primeiro grau	gastroenterológico	2	0	0	0	0	0	0	0	1	0	0	9.9	6	5	0	0	0	1	0	1	0	1	1	1	1	0	1	1	3	5	10	10	10	10	15	15	5	10
112	1568357	2	14707240	2014-10-15	2014-10-17	2	0	0	89.3	Superior	infeccioso	5	1	0	0	0	0	1	0	0	0	1	12.1	7	0	0	0	0	1	0	1	1	1	1	1	1	1	1	1	1	5	0	5	10	10	15	15	10	10
113	352414	1	14702738	2014-10-15	2014-10-19	4	0	0	76.6	Segundo grau	ortopédico	3	0	0	0	0	0	1	0	0	0	0	13.8	9	0	0	1	2	1	1	1	1	1	1	1	1	1	1	1	0	5	10	10	10	10	15	15	10	10
114	448040	1	14684197	2014-10-13	2014-10-17	4	0	0	81.7	Superior	infeccioso	2	0	0	0	0	0	0	0	0	0	0	12.1	3	0	0	0	0	0	1	1	1	1	0	1	1	1	1	0	2	5	5	5	10	10	15	15	10	10
115	592978	2	14666692	2014-10-11	2014-10-17	6	0	0	88	primeiro grau	infeccioso	3	0	0	0	0	0	0	1	0	0	0	11.5	5	2	1	0	0	1	2	2	2	2	2	2	2	2	2	2		0	10	10	5	5	5	5	5	5
116	1334251	2	14666813	2014-10-11	2014-10-14	3	0	0	80.8	Superior	neurológico	3	0	0	0	0	0	0	0	0	0	0	13.4	8	0	1	0	0	0	2	2	2	2	2	2	2	2	2	2		0	10	10	10	5	10	15	5	5
117	1030249	2	14672444	2014-10-12	2014-10-18	6	0	0	81.8	Superior	infeccioso	3	0	0	0	0	0	1	1	0	0	0	12.2	8	1	0	0	0	1	2	2	2	2	2	2	2	2	2	2		0	5	5	5	5	5	10	5	5
118	1287174	1	14668839	2014-10-11	2014-10-19	8	0	0	91	primeiro grau	infeccioso	4	0	0	0	0	0	0	0	0	0	1	11.4	5	1	0	0	0	1	0	0	0	0	0	0	0	0	0	0	10	0	10	10	0	0	0	10	0	5
119	406207	1	14823101	2014-10-28	2014-11-10	13	0	0	91.1	primeiro grau	infeccioso	4	0	0	0	0	0	1	0	0	0	1	12.8	9	0	0	0	0	1	1	1	1	1	1	1	1	1	1	1	0	5	10	0	10	10	15	10	5	5
120	1115583	2	14826966	2014-10-29	2014-11-05	7	0	0	96.9	Superior	pulmonar	1	0	1	0	0	0	0	0	0	0	0	14.9	6	1	0	0	0	1	1	1	1	1	1	1	1	1	1	1	0	5	10	10	10	10	15	15	10	10
121	1249316	1	14823174	2014-10-28	2014-11-01	4	0	0	82.1	Superior	neurológico	4	0	0	1	0	0	1	0	0	0	0	15.2	7	0	0	1	1	1	0	0	0	1	1	1	1	1	1	1	3	5	10	0	10	5	10	10	10	5
122	866971	2	14843253	2014-10-30	2014-11-01	2	0	0	81.7	Superior	neurológico	3	0	0	1	0	0	1	0	0	0	0	12.1	3	0	0	0	0	1	1	1	1	1	0	1	1	1	1	1	1	5	10	5	10	10	15	15	10	10
123	405552	2	14833417	2014-10-29	2014-11-07	9	0	0	90.9	primeiro grau	infeccioso	2	0	0	0	0	0	0	0	0	0	1	11.7	4	2	0	0	0	1	0	1	1	1	0	1	1	1	1	1	2	5	10	10	10	10	15	15	10	10
124	598930	2	14833965	2014-10-29	2014-11-02	4	0	0	79.4	Superior	neurológico	1	0	0	0	0	0	0	1	0	0	0	14.5	8	6	0	0	0	1	2	2	2	2	2	2	2	2	2	2		5	5	10	10	10	10	10	5	10
125	1017665	1	14826703	2014-10-29	2014-10-31	2	0	0	76.5	primeiro grau	gastroenterológico	6	0	0	0	0	0	1	0	0	0	0	11.2	8	0	0	0	0	1	1	1	1	1	1	1	1	1	1	1	0	5	10	5	10	10	15	15	10	10
126	1489492	1	14812368	2014-10-28	2014-10-29	1	0	0	67.3	Segundo grau	cardiovascular	3	0	0	0	0	0	0	0	0	0	1	15.3	7	0	0	0	0	0	0	0	1	1	1	1	1	1	1	1	2	5	10	10	10	10	15	15	10	10
127	1680365	1	14808991	2014-10-27	2014-10-29	2	0	0	68.7	Superior	cardiovascular	4	0	0	0	0	0	0	0	1	0	1	13.3	7	1	0	0	0	0	1	1	1	1	1	1	1	1	1	0	1	5	10	10	10	10	15	15	10	10
128	1007450	2	14797833	2014-10-25	2014-10-29	4	0	0	63.2	Superior	dermatológico	2	0	0	1	0	0	0	0	0	0	0	11.8	0	1	0	0	0	0	1	1	1	1	1	1	1	1	1	1	0	5	10	5	10	10	15	15	10	10
129	466128	2	14807832	2014-10-27	2014-10-30	3	0	0	88.5	Superior	cardiovascular	5	0	0	0	0	1	0	0	0	0	1	8.3	9	4	0	0	0	1	1	1	1	1	1	1	1	1	1	1	0	5	10	10	10	10	15	10	10	5
130	307707	1	14798395	2014-10-25	2014-11-05	11	0	0	88.6	Superior	infeccioso	3	0	0	1	0	0	0	1	0	0	0	11.4	7	0	0	0	0	1	2	2	2	2	2	2	2	2	2	2		0	10	10	5	10	15	15	5	10
131	956568	2	14790770	2014-10-24	2014-10-30	6	0	0	86.9	Superior	infeccioso	3	0	0	0	0	0	0	0	0	0	0	14.4	10	2	0	1	2	0	0	1	1	1	0	1	1	0	1	1	3	5	10	10	10	10	15	15	10	10
132	339682	2	14798692	2014-10-25	2014-11-16	22	1	0	88.6	Superior	gastroenterológico	3	0	0	0	0	0	0	1	0	0	0	12.4	9	0	0	0	0	1	2	2	2	2	2	2	2	2	2	2		0	0	0	0	0	0	10	0	0
133	948456	2	14779090	2014-10-23	2014-10-27	4	0	0	60.5	Superior	endocrinológico	1	0	0	0	0	0	0	0	0	0	0	16.1	1	0	0	0	0	1	1	1	1	1	1	1	1	1	1	1	0	5	10	10	10	10	15	15	10	10
134	1435215	1	14760637	2014-10-21	2014-10-29	8	0	0	68.6	Superior	gastroenterológico	3	0	0	0	0	0	0	0	0	0	0	13.6	6	0	0	0	0	1	0	1	1	1	1	1	1	1	1	1	1	5	10	10	10	10	15	15	10	10
135	1588680	1	14768581	2014-10-22	2014-10-24	2	0	0	83.4	Superior	cardiovascular	3	0	0	1	0	0	0	0	0	0	0	13.6	4	1	0	0	0	1	0	1	1	1	1	1	1	1	1	1	1	5	10	10	10	10	15	15	10	10
136	610089	2	14670035	2014-10-12	2014-10-19	7	0	0	81.7	Superior	cardiovascular	5	0	0	0	0	1	0	0	0	0	1	14.8	9	1	0	0	0	1	1	1	1	1	1	1	1	1	1	1	0	5	10	10	10	10	15	15	10	10
137	590927	2	14655877	2014-10-10	2014-10-16	6	0	0	68.7	Superior	infeccioso	4	0	0	0	0	0	0	0	0	0	0	13	9	0	0	0	0	0	1	1	1	1	1	1	1	1	1	1	0	5	10	10	10	10	15	15	10	10
138	392201	1	14663142	2014-10-10	2014-10-16	6	0	0	92.3	Segundo grau	infeccioso	6	0	0	1	0	0	0	1	0	0	1	11.9	8	1	0	0	0	1	2	2	2	2	2	2	2	2	2	2		0	10	10	5	5	10	10	0	5
139	362769	1	14661728	2014-10-10	2014-10-13	3	0	0	89.1	primeiro grau	cardiovascular	5	0	0	0	1	0	1	0	0	0	1	12.3	8	0	0	0	0	1	0	1	1	0	1	1	1	1	1	1	2	5	10	10	10	10	10	10	5	0
140	761502	1	14673661	2014-10-12	2014-10-25	13	0	0	68.5	Segundo grau	gastroenterológico	3	0	0	0	0	0	1	0	0	0	0	12.6	8	0	0	0	0	1	1	1	1	1	1	1	1	1	1	1	0	5	10	10	10	10	15	15	10	10
141	419970	2	14926432	2014-11-08	2014-11-11	3	0	0	79.2	Segundo grau	neurológico	2	1	0	0	0	0	0	0	0	0	0	13.5	5	2	0	0	0	1	0	0	1	0	1	0	0	1	1	0	6	0	5	0	5	5	5	0	5	0
142	415158	2	14914684	2014-11-07	2014-11-13	6	0	0	87.3	primeiro grau	cardiovascular	6	0	1	1	0	1	0	0	0	0	1	12.5	8	3	0	0	0	1	0	1	1	0	1	0	1	1	1	1	3	5	10	10	10	10	10	10	5	5
143	352174	1	14908368	2014-11-06	2014-11-07	1	0	0	66	segundo grau	neurológico	1	0	0	0	0	0	0	0	0	0	0	14.2	4	0	0	0	0	1	1	1	1	1	1	1	1	1	1	0	1	5	10	10	10	10	15	15	10	10
144	498768	1	14883615	2014-11-04	2014-11-11	7	0	0	91.2	Segundo grau	infeccioso	3	0	0	0	0	0	1	1	0	0	0	12.9	5	1	1	0	0	1	2	2	2	2	2	2	2	2	2	2		0	0	0	5	0	5	10	0	0
145	1432362	2	14833543	2014-11-04	2014-11-08	4	0	0	68.8	Superior	gastroenterológico	2	0	0	0	0	0	0	0	0	0	0	16.2	2	0	0	0	0	1	1	1	1	1	1	1	1	1	1	1	0	5	10	10	10	10	15	15	10	10
146	565001	2	14810559	2014-11-05	2014-11-07	2	0	0	69.4	Superior	urológico	2	0	1	1	0	0	0	0	0	0	0	13.4	2	0	0	0	0	0	1	1	1	1	1	1	1	1	1	1	0	5	10	10	10	10	15	15	10	10
147	483692	2	14900246	2014-11-05	2014-11-07	2	0	0	77.7	superior	hematológico	4	0	0	0	0	0	0	0	0	0	1	6.6	11	0	0	0	0	0	1	0	1	1	1	1	1	1	1	1	1	5	10	10	10	10	15	15	10	10
148	1757490	1	14898909	2014-11-05	2014-11-06	1	0	0	77.3	Segundo grau	neurológico	3	1	0	0	0	0	0	0	0	0	0	14.2	4	1	0	0	0	0	1	1	1	1	1	1	1	1	1	1	0	5	10	10	10	10	15	15	10	10
149	608345	1	14889725	2014-11-05	2014-11-09	4	0	0	67	superior	gastroenterológico	3	0	0	0	0	0	0	0	0	0	0	13.1	4	1	0	0	0	0	1	1	1	1	1	1	1	1	1	0	1	5	10	10	10	10	15	15	10	10
150	607897	1	14920774	2014-11-07	2014-11-12	5	0	0	84.5	superior	pulmonar	4	0	0	0	0	0	0	0	0	0	0	13.1	6	0	0	0	0	0	1	1	1	1	1	1	1	1	1	1	0	5	10	10	10	10	15	15	10	10
151	482261	2	14924699	2014-11-08	2014-11-14	6	0	0	81.4	superior	infeccioso	2	0	0	0	0	0	0	0	0	0	0	12.9	8	0	0	0	0	1	1	1	1	1	1	1	1	1	1	1	0	5	10	5	10	10	15	15	10	10
152	344993	2	14921187	2014-11-07	2014-11-11	4	0	0	85.5	Segundo grau	neurológico	3	0	0	0	0	0	0	0	0	0	1	13	5	0	0	1	5	1	1	1	1	1	1	1	1	1	1	1	0	5	5	5	10	10	15	10	10	10
153	408226	1	14927620	2014-11-09	2015-05-29	201	1	1	88.4	primeiro grau	infeccioso	3	0	0	0	0	0	0	1	0	0	0	12	8	2	0	0	0	0	2	2	2	2	2	2	2	2	2	2		5	5	0	0	0	0	0	0	0
154	336015	1	14940401	2014-11-10	2014-11-14	4	0	0	82.3	superior	gastroenterológico	3	0	0	0	0	0	0	0	0	0	0	12.7	5	3	0	0	0	1	0	1	1	1	1	0	1	1	1	0	3	5	10	10	10	10	15	10	10	10
155	1448300	2	14929775	2014-11-09	2014-11-14	5	0	0	80.2	superior	cardiovascular	3	0	0	1	0	1	0	0	0	0	0	13.6	5	1	0	0	0	1	1	1	1	1	1	1	1	1	1	1	0	5	10	10	10	10	15	15	10	10
156	359343	2	14862597	2014-11-02	2014-11-05	3	0	0	70	superior	gastroenterológico	1	0	0	0	0	0	0	0	0	0	0	14.6	4	0	0	0	0	1	1	1	1	1	1	1	1	1	1	0	1	5	10	10	10	10	15	15	10	10
157	329092	2	14869312	2014-11-03	2014-11-05	2	0	0	74.5	superior	cardiovascular	3	0	0	0	0	0	0	0	0	0	1	13.8	9	1	0	0	0	1	0	1	1	1	1	1	1	1	1	1	1	5	10	10	10	10	15	15	10	10
158	367602	2	14865362	2014-11-02	2014-11-10	8	0	0	82.6	superior	nefrológico	4	0	0	0	0	0	0	0	0	0	0	13	9	0	0	0	0	1	1	1	1	1	1	1	1	1	0	1	1	5	10	10	10	10	15	15	10	10
159	1620351	1	14860520	2014-11-01	2014-11-08	7	0	0	62.7	primeiro grau	gastroenterológico	1	0	0	1	0	0	0	0	0	0	0	13.5	1	0	0	0	0	1	0	1	1	1	1	1	1	1	1	1	1	5	10	10	10	10	15	15	10	10
160	411329	1	14869107	2014-11-03	2014-11-04	1	0	0	75.8	superior	neurológico	4	0	0	0	0	0	0	0	0	0	0	12.5	5	0	0	1	5	0	1	1	1	1	1	1	1	1	1	0	1	5	10	10	10	10	15	15	10	10
161	418011	2	14984614	2014-11-15	2014-11-17	2	0	0	86.7	Superior	neurológico	3	1	0	0	0	0	1	0	0	0	0	12	7	0	0	0	0	1	0	1	0	0	0	0	0	0	1	0	8	5	10	10	10	10	15	15	10	10
162	1282756	1	14991131	2014-11-16	2014-11-19	3	0	0	84.4	Superior	neurológico	2	0	0	0	0	0	0	0	0	0	0	12.8	8	0	0	0	0	1	0	1	1	0	1	1	1	1	1	0	3	5	5	10	10	10	15	10	10	10
163	891792	2	14991294	2014-11-16	2014-11-19	3	0	1	62.7	Segundo grau	infeccioso	5	0	0	1	0	0	0	0	0	0	1	12.8	8	2	0	0	0	1	1	0	1	1	1	1	1	1	1	1	1	5	10	10	10	10	15	10	10	5
164	479325	1	14972686	2014-11-13	2014-11-17	4	0	0	63.9	Segundo grau	neurológico	3	1	0	0	0	0	0	0	0	0	0	11.4	8	0	0	0	0	1	0	1	1	1	1	1	1	1	1	0	2	5	10	10	10	10	15	15	10	10
165	616175	1	14944626	2014-11-11	2014-11-14	3	0	0	83.7	Segundo grau	gastroenterológico	1	0	0	0	0	0	0	0	0	0	0	11.9	1	0	0	0	0	1	0	1	1	1	1	1	1	1	1	1	1	5	10	10	10	10	15	15	10	10
166	1083963	2	14821507	2014-11-12	2014-11-15	3	0	0	81.3	Superior	ortopédico	4	0	0	0	0	0	1	0	0	0	0	11.4	4	0	0	0	0	1	1	1	1	1	1	1	1	1	1	1	0	5	10	10	10	10	15	15	10	10
167	1294906	2	14418609	2014-11-13	2014-11-14	1	0	0	67.8	Superior	ortopédico	1	0	0	0	0	0	0	0	0	0	0	13.2	3	0	0	0	0	0	1	0	1	1	1	1	1	1	1	1	1	5	10	10	10	10	15	15	10	10
168	874608	1	14843790	2014-11-12	2014-11-16	4	0	0	79.5	Superior	ortopédico	3	0	0	0	0	0	0	0	0	0	0	12.7	1	0	0	0	0	1	1	1	1	1	1	1	1	1	1	1	0	5	10	10	10	10	15	15	10	10
169	919744	2	15061544	2014-11-25	2014-11-30	5	0	0	61.1	Superior	infeccioso	2	0	0	0	0	0	1	0	0	0	0	14.9	7	0	0	0	0	1	1	1	1	1	1	1	1	1	1	1	0	5	10	10	10	10	15	15	10	10
170	1348474	1	15007883	2014-11-25	2014-11-26	1	0	0	63	Superior	urológico	4	0	0	0	0	0	1	0	0	0	0	12.2	8	1	0	0	0	1	1	1	1	1	1	1	1	1	1	1	0	5	10	10	10	10	15	15	10	10
171	432507	2	15061495	2014-11-25	2014-11-29	4	0	0	60.8	Superior	gastroenterológico	1	0	0	0	0	0	0	0	0	0	0	14.1	3	0	0	0	0	0	1	1	1	1	1	1	1	1	1	1	0	5	10	10	10	10	15	15	10	10
172	601884	2	15046412	2014-11-24	2014-11-26	2	0	0	62.1	Superior	gastroenterológico	3	0	0	1	0	0	0	0	0	0	0	15.8	4	0	0	0	0	1	1	1	1	1	1	1	1	1	1	1	0	5	10	10	10	10	15	10	10	5
173	730825	1	15062368	2014-11-25	2014-11-27	2	0	0	71.6	Segundo grau	infeccioso	2	0	0	0	0	0	0	0	0	0	0	13	2	0	0	0	0	0	1	1	1	1	1	1	1	1	1	1	0	5	10	10	10	10	15	15	10	10
174	317736	1	15055263	2014-11-24	2014-11-27	3	0	0	76.3	Segundo grau	ortopédico	2	0	0	0	0	0	1	0	0	0	0	13.5	4	0	0	1	5	0	0	1	1	1	1	1	1	1	1	1	1	5	10	10	10	10	15	15	10	10
175	384286	2	15051790	2014-11-24	2014-11-26	2	0	0	84.4	Superior	ortopédico	5	1	0	0	0	0	1	0	0	0	1	8.9	9	3	0	0	0	1	0	0	1	1	1	1	1	1	1	0	3	5	10	10	10	10	15	10	10	5
176	918649	2	15051763	2014-11-24	2014-11-26	2	0	0	61.5	Superior	gastroenterológico	2	0	0	1	0	0	0	0	0	0	0	13.6	2	0	0	0	0	1	1	1	1	1	1	1	1	1	1	1	0	5	10	5	10	10	15	15	10	10
177	764746	2	15044734	2014-11-23	2014-11-29	6	0	0	63.4	Superior	gastroenterológico	2	0	0	0	0	0	0	0	0	0	0	14.4	3	0	0	0	0	1	1	1	1	1	1	1	1	1	1	0	1	5	10	10	10	10	15	15	10	10
178	1579464	2	15044487	2014-11-23	2014-11-26	3	0	0	68.8	Superior	gastroenterológico	1	0	0	0	0	0	0	0	0	0	0	14.1	3	0	0	0	0	1	0	1	1	1	1	1	1	1	1	1	1	5	10	10	10	10	15	15	10	10
179	457099	1	15036446	2014-11-22	2014-12-24	32	1	0	87	primeiro grau	infeccioso	3	0	0	0	0	0	0	0	0	0	0	7.4	14	0	0	0	0	0	0	1	1	1	1	1	0	1	1	0	3	5	10	10	10	10	15	15	10	10
180	554393	2	15043297	2014-11-23	2014-11-25	2	0	0	66.9	Superior	infeccioso	1	0	0	0	0	0	0	0	0	0	0	15.4	0	1	0	0	0	0	1	1	1	1	1	1	1	1	1	1	0	5	10	10	10	10	15	15	10	10
181	443048	1	15042436	2014-11-23	2014-11-27	4	0	0	70.7	Superior	ortopédico	1	0	0	0	0	0	0	0	0	0	0	12.3	1	0	0	0	0	0	1	1	1	1	1	1	1	1	1	1	0	5	10	10	10	10	15	15	10	10
182	819085	1	15038766	2014-11-22	2014-11-27	5	0	0	65.4	Superior	ortopédico	2	0	0	0	0	0	0	0	0	0	0	11.4	4	0	0	0	0	0	0	1	1	1	1	1	1	1	1	0	2	5	10	10	10	10	15	15	10	10
183	552752	1	14368915	2014-11-21	2014-11-25	4	0	0	76.8	Superior	ortopédico	3	0	0	1	0	0	0	0	0	0	0	10.4	3	0	0	0	0	0	1	1	1	1	1	1	1	1	1	1	0	5	10	10	10	10	15	15	10	10
184	453696	1	14996767	2014-11-17	2014-11-25	8	0	0	87.9	primeiro grau	ortopédico	2	0	0	0	0	0	0	0	0	0	0	13	4	1	0	0	0	1	0	1	1	1	0	1	1	1	1	0	3	5	10	5	10	5	5	10	5	5
185	750671	1	15005712	2014-11-18	2014-11-19	1	0	0	67.4	Superior	ortopédico	1	0	0	0	0	0	0	0	0	0	0	14.6	2	0	0	1	5	0	1	1	1	1	1	1	1	1	1	1	0	5	10	10	10	10	15	15	10	10
186	404196	1	14980498	2014-11-17	2014-11-19	2	0	0	62.8	Superior	ortopédico	4	1	0	0	0	0	1	0	0	0	0	12	7	1	0	0	0	1	1	1	1	1	1	1	1	1	1	1	0	5	10	10	10	10	15	15	10	10
187	1764629	1	15003150	2014-11-18	2014-11-19	1	0	0	70.4	Superior	hematológico	4	0	0	0	0	0	1	0	0	0	0	7.5	8	0	0	0	0	1	0	1	1	1	1	1	1	1	1	1	1	5	10	10	10	10	15	15	10	10
188	553160	1	15083723	2014-11-27	2014-11-28	1	0	0	88.8	Segundo grau	ortopédico	3	0	0	0	0	0	0	0	0	0	0	11.3	4	1	0	1	5	1	0	1	1	1	1	1	1	1	1	0	2	5	10	5	10	10	15	15	10	10
189	1755499	2	14938250	2014-11-26	2014-11-29	3	0	0	60.9	Superior	ortopédico	1	0	0	0	0	0	1	0	0	0	0	13.5	4	0	0	0	0	1	1	1	1	1	1	1	1	1	0	0	2	5	10	5	10	10	15	15	10	10
190	1244712	2	15084901	2014-11-27	2014-11-29	2	0	0	70.1	Superior	gastroenterológico	3	0	0	0	0	0	1	0	0	0	0	10.6	6	0	0	0	0	1	0	1	1	1	1	1	1	1	1	1	1	5	10	10	10	10	15	15	10	10
191	1426476	1	15078053	2014-11-26	2014-11-28	2	0	0	77.9	primeiro grau	ortopédico	2	0	0	0	0	0	0	0	0	0	0	11.4	3	1	0	1	5	1	1	1	0	1	1	1	1	0	1	0	3	5	10	10	10	10	15	15	10	10
192	541763	1	15033611	2014-11-28	2014-12-04	6	0	0	61.3	Superior	ortopédico	1	0	0	0	0	0	0	0	0	0	0	9.2	2	0	0	0	0	1	1	1	1	1	1	1	1	1	1	1	0	5	10	10	10	10	15	15	10	10
193	1075228	1	15032778	2014-11-28	2014-12-02	4	0	0	83.6	primeiro grau	ortopédico	2	0	0	0	0	0	0	0	0	0	0	11.1	3	0	0	0	0	0	0	1	1	1	1	1	1	1	1	1	1	5	10	5	10	10	15	10	10	0
194	405278	2	15092471	2014-11-28	2014-12-06	8	0	0	79	Superior	infeccioso	1	0	0	0	0	0	0	0	0	0	0	13.8	4	4	0	0	0	1	0	1	1	1	1	1	1	1	1	1	1	5	10	10	10	10	15	15	10	10
195	1566986	2	15169642	2014-12-07	2014-12-11	4	0	0	64.5	primeiro grau	infeccioso	3	0	0	0	0	0	1	0	1	0	0	9.2	8	5	0	0	0	1	0	1	1	1	1	1	1	1	1	1	1	5	10	5	10	10	15	15	10	10
196	1181547	2	15191637	2014-12-09	2014-12-11	2	0	0	70.8	primeiro grau	ortopédico	2	0	0	1	0	0	0	0	0	0	0	12.5	1	5	0	0	0	0	1	1	1	1	1	1	1	1	1	1	0	5	10	10	10	10	15	15	10	10
197	314973	2	15184329	2014-12-09	2014-12-10	1	0	0	70	superior	gastroenterológico	3	0	0	0	0	0	0	0	0	0	0	15.2	4	2	0	0	0	0	0	1	1	1	1	1	1	1	1	1	1	5	10	10	10	10	15	15	10	10
198	394594	1	15181055	2014-12-08	2014-12-10	2	0	0	63.1	superior	gastroenterológico	4	0	0	0	0	0	1	0	0	0	0	11.5	10	1	0	0	0	0	1	1	1	1	1	1	1	1	1	1	0	5	10	10	10	10	15	15	10	10
199	501867	2	15021478	2014-11-28	2014-12-02	4	0	0	74.6	superior	urológico	5	0	0	0	0	1	1	0	0	0	1	11.1	14	1	0	0	0	0	1	1	1	1	1	1	1	1	1	0	1	5	10	10	10	10	15	15	10	10
200	507991	1	15180396	2014-12-08	2014-12-10	2	0	0	68.9	primeiro grau	neurológico	3	0	0	0	0	0	1	0	0	0	0	11.5	5	0	0	1	5	1	0	1	1	1	1	1	1	1	1	1	1	5	10	10	10	10	15	15	10	10
201	332149	1	15171766	2014-12-08	2014-12-11	3	0	0	65.2	superior	ortopédico	3	0	0	1	0	0	1	0	0	0	0	11.3	12	1	0	0	0	1	1	1	1	1	1	1	1	1	1	1	0	5	10	5	10	10	15	10	10	10
202	898617	1	15177168	2014-12-08	2014-12-12	4	0	0	71.8	superior	ortopédico	4	0	1	0	0	0	0	0	0	0	0	13.3	6	0	0	0	0	0	1	1	1	1	1	1	1	1	1	1	0	5	10	10	10	10	15	15	10	10
203	530161	1	15173908	2014-12-08	2014-12-13	5	0	0	77.8	superior	ortopédico	3	0	0	0	0	0	0	0	0	0	0	13.8	4	1	0	1	5	0	0	1	1	1	1	1	1	1	1	1	1	5	10	5	10	10	15	15	10	10
204	317736	1	15165668	2014-12-06	2014-12-17	11	0	0	76.3	Segundo grau	ortopédico	3	0	0	0	0	0	1	0	0	0	0	12.2	3	1	0	1	5	1	1	1	1	1	1	1	1	1	1	1	0	5	10	10	10	10	15	15	10	10
205	1079831	2	15155681	2014-12-05	2014-12-23	18	1	0	68.8	superior	gastroenterológico	3	0	0	0	0	0	0	0	0	0	0	13.2	10	0	0	0	0	1	1	1	1	0	1	1	1	1	1	1	1	5	10	10	10	10	15	15	10	10
206	515476	1	15169370	2014-12-07	2014-12-08	1	0	0	66.5	superior	gastroenterológico	1	0	0	0	0	0	0	0	0	0	0	14.2	2	0	0	0	0	1	1	1	1	1	1	1	1	1	1	1	0	5	10	10	10	10	15	15	10	10
207	961125	1	15168946	2014-12-07	2014-12-10	3	0	0	92.1	primeiro grau	cardiovascular	2	0	0	0	0	0	0	0	0	0	1	13.5	10	0	0	0	0	0	0	1	1	1	1	1	1	1	1	1	1	5	10	10	10	10	15	15	10	10
208	1337422	2	15168572	2014-12-07	2014-12-09	2	0	0	66.9	superior	gastroenterológico	3	0	0	0	0	0	0	0	0	0	0	10.9	6	3	0	0	0	0	1	1	1	1	1	1	1	1	1	1	0	5	10	10	10	10	15	15	10	10
209	358758	2	15169174	2014-12-07	2014-12-20	13	0	0	76.7	superior	infeccioso	3	0	0	1	0	0	0	1	0	0	0	14.8	7	0	0	0	0	1	2	2	2	2	2	2	2	2	2	2		0	10	5	5	5	10	10	5	5
210	1392985	2	15210124	2014-12-11	2014-12-13	2	0	0	61.3	superior	ortopédico	3	0	0	0	0	0	0	0	0	0	0	14.7	4	0	0	0	0	0	1	1	1	1	1	1	1	1	1	1	0	5	10	10	10	10	15	15	10	10
211	395578	2	15075245	2014-12-11	2014-12-13	2	0	0	70.1	Superior	ortopédico	2	0	0	0	0	0	1	0	0	0	0	11.5	5	0	0	0	0	1	1	1	1	1	1	1	1	1	1	1	0	5	10	10	10	10	15	15	10	10
212	940149	2	15181406	2014-12-09	2014-12-15	6	0	0	70	Superior	neurológico	4	0	0	0	0	0	1	0	0	0	1	14.5	9	0	0	1	5	1	0	1	1	1	1	1	1	1	1	1	1	5	10	10	10	10	15	15	10	10
213	1326887	1	15084616	2014-12-11	2014-12-12	1	0	0	66.8	Superior	ortopédico	4	0	0	0	0	0	1	0	0	0	1	13.8	8	0	0	0	0	1	1	1	1	1	1	1	1	1	1	1	0	5	10	5	10	10	15	10	10	5
214	705997	2	15208465	2014-12-11	2014-12-14	3	0	0	82.4	primeiro grau	gastroenterológico	3	0	0	0	0	0	1	0	0	0	0	15.4	4	0	0	0	0	0	0	1	1	1	1	1	1	1	1	1	1	5	10	10	10	10	15	15	10	10
215	426237	2	15196258	2014-12-10	2014-12-16	6	0	0	81	Superior	infeccioso	4	0	0	0	0	0	0	0	0	0	0	14.2	6	0	0	0	0	0	1	1	1	1	1	1	1	1	0	1	1	5	10	10	10	10	15	15	10	10
216	595973	2	15089601	2014-12-11	2014-12-12	1	0	0	70.2	Superior	gastroenterológico	3	0	0	0	0	0	0	0	0	0	1	16.6	5	0	0	0	0	0	1	1	1	1	1	1	1	1	1	1	0	5	10	10	10	10	15	15	10	10
217	766344	1	15223103	2014-12-13	2014-12-17	4	0	0	82.5	Superior	cardiovascular	4	0	0	0	0	0	1	0	0	0	0	12.6	6	0	0	0	0	1	0	1	1	1	1	1	1	1	1	1	1	5	10	10	10	10	15	15	10	10
218	326158	2	15233874	2014-12-15	2014-12-20	5	0	0	75.2	Superior	pulmonar	5	0	1	0	0	0	1	0	0	0	0	14.3	13	0	0	0	0	1	1	1	1	1	1	1	1	1	1	1	0	5	10	10	10	10	15	15	10	10
219	754437	2	15221958	2014-12-13	2014-12-16	3	0	0	65.6	Superior	infeccioso	2	0	0	0	0	0	1	0	0	0	0	13.1	9	0	0	0	0	1	1	1	1	1	1	1	1	1	1	1	0	5	10	10	10	10	15	15	10	10
220	599276	2	15236382	2014-12-15	2014-12-17	2	0	0	84.7	Superior	infeccioso	5	0	0	1	0	0	1	0	1	0	1	11.8	8	3	0	0	0	0	0	1	1	0	0	1	1	1	1	0	4	5	10	10	10	10	15	10	10	10
221	369077	1	15234292	2014-12-15	2014-12-17	2	0	0	91.1	Superior	ortopédico	1	0	0	0	0	0	0	0	0	0	0	13.5	1	0	0	0	0	1	1	1	1	1	1	1	1	1	1	1	0	5	10	10	10	10	15	15	10	10
222	965326	2	15217479	2014-12-12	2014-12-15	3	0	0	75.2	Segundo grau	cardiovascular	4	0	0	0	0	0	1	0	0	0	1	10.8	16	4	0	0	0	1	1	1	1	1	1	1	1	1	1	1	0	5	10	10	10	10	15	15	10	10
223	782943	2	15215979	2014-12-12	2014-12-19	7	0	0	72	Superior	cardiovascular	4	0	0	0	0	0	1	0	0	0	1	15	5	2	0	0	0	1	0	1	1	1	1	1	1	1	1	1	1	5	10	10	10	10	15	15	10	10
224	1076732	2	15229211	2014-12-14	2014-12-17	3	0	0	64.5	Segundo grau	endocrinológico	2	1	0	0	0	0	1	0	0	0	0	16.9	9	0	0	0	0	1	1	1	1	1	1	1	1	1	1	1	0	0	10	10	0	0	0	0	0	0
225	1326654	2	15228969	2014-12-14	2014-12-19	5	0	0	68.1	Superior	gastroenterológico	1	0	0	0	0	0	0	0	1	0	0	14.5	0	0	0	0	0	0	1	1	1	0	1	1	1	1	1	1	1	5	10	10	10	10	15	15	10	10
226	799821	2	15109496	2014-12-12	2014-12-15	3	0	0	87.7	Superior	urológico	4	0	0	0	0	0	1	0	0	0	1	12.6	13	1	0	0	0	1	1	1	1	1	1	1	1	1	1	1	0	5	10	10	10	10	15	15	10	10
227	1538682	1	15350692	2015-01-05	2015-01-13	8	0	0	90.4	Segundo grau	gastroenterológico	2	0	0	0	0	0	0	1	0	0	0	12.7	7	1	0	0	0	1	2	2	2	2	2	2	2	2	2	2		0	0	0	0	0	0	10	0	0
228	514788	1	15266722	2015-01-05	2015-01-08	3	0	0	65.3	Superior	oncológico	3	0	0	1	0	0	0	0	0	0	0	13	4	0	0	0	0	0	1	1	1	0	1	1	1	1	1	1	1	5	10	10	10	10	15	15	10	10
229	1144010	2	15358227	2015-01-05	2015-01-09	4	0	0	61.7	Superior	infeccioso	1	0	0	0	0	0	0	0	0	0	0	14.6	2	0	0	0	0	1	1	1	1	1	1	1	1	1	1	1	0	5	10	10	10	10	15	15	10	10
230	1109942	1	15357463	2015-01-05	2015-01-15	10	0	0	70.8	Superior	gastroenterológico	3	0	0	0	0	0	0	0	0	0	0	12.9	8	0	0	0	0	1	1	1	1	1	1	1	1	1	1	0	1	5	10	10	10	10	15	15	10	10
231	470506	1	15346232	2015-01-04	2015-01-07	3	0	0	66.2	Superior	ortopédico	5	0	0	1	0	0	0	0	0	0	0	10.3	12	0	0	1	5	1	1	1	1	1	1	1	1	1	1	1	0	5	10	5	10	10	15	15	10	10
232	536356	2	15347455	2015-01-04	2015-01-16	12	0	0	74.2	Superior	ortopédico	4	0	0	1	0	0	0	0	0	0	0	12.4	3	0	0	1	5	0	1	1	1	1	1	1	1	1	1	1	0	5	10	10	10	10	15	15	10	10
233	479648	1	15356354	2015-01-05	2015-01-13	8	0	0	83	Superior	ortopédico	2	0	0	0	0	0	0	1	0	0	0	12.6	7	0	0	0	0	0	2	2	2	2	2	2	2	2	2	2		0	10	10	10	10	10	10	5	0
234	905874	2	15312257	2015-01-05	2015-01-08	3	0	0	69.3	Superior	ortopédico	2	0	0	0	0	0	1	0	0	0	0	12.3	7	0	0	0	0	1	1	1	1	1	1	1	1	1	1	1	0	5	10	10	10	10	15	15	10	10
235	800752	1	15463946	2015-01-18	2015-02-08	21	1	0	80.7	primeiro grau	gastroenterológico	4	0	0	0	0	0	1	1	0	0	1	11.2	9	4	0	0	0	1	2	2	2	2	2	2	2	2	2	2		5	5	10	10	10	15	15	10	10
236	436230	1	15460167	2015-01-17	2015-01-28	11	0	0	84.2	Superior	infeccioso	1	0	0	0	0	0	0	1	0	0	0	10.1	7	0	0	0	0	0	2	2	2	2	2	2	2	2	2	2		0	0	0	0	0	0	0	0	0
237	454180	1	15460195	2015-01-17	2015-01-20	3	0	0	88.6	primeiro grau	pulmonar	4	0	1	0	0	0	0	0	0	0	0	12.4	12	2	0	1	5	1	0	1	1	1	1	1	1	1	1	1	1	5	5	5	10	5	10	10	5	5
238	464903	1	15454759	2015-01-16	2015-01-21	5	0	0	81.1	Superior	infeccioso	3	0	0	1	0	0	0	0	0	0	0	12.3	4	1	0	0	0	1	0	1	1	1	1	1	1	1	1	1	1	5	10	5	10	10	15	15	10	10
239	1773914	2	15385546	2015-01-19	2015-01-22	3	0	0	63.5	Superior	oncológico	2	0	0	1	0	0	0	0	0	0	0	12.5	7	0	0	0	0	0	1	1	1	1	1	1	1	1	1	1	0	5	10	10	10	10	15	15	10	10
240	562665	2	15467469	2015-01-19	2015-01-21	2	0	0	74.2	Superior	gastroenterológico	2	0	0	0	0	0	0	0	0	0	0	11	5	0	0	0	0	1	1	1	1	1	1	1	1	1	1	1	0	5	10	10	10	10	15	15	10	10
241	912325	2	15297212	2015-01-19	2015-01-21	2	0	0	62.1	Superior	endocrinológico	3	0	0	0	0	0	0	0	0	0	1	14.6	4	0	0	0	0	1	1	1	1	1	1	1	1	1	1	1	0	5	10	10	10	10	15	15	10	10
242	424986	2	15465392	2015-01-19	2015-01-21	2	0	0	77.6	Superior	neurológico	4	0	0	0	0	1	1	0	0	0	1	13.1	9	0	0	0	0	1	1	1	1	1	1	1	1	1	1	1	0	5	10	10	10	10	15	15	10	10
243	736938	2	15460526	2015-01-17	2015-02-01	15	1	0	77.2	Superior	infeccioso	2	0	0	0	0	0	1	0	0	0	0	13.7	4	1	0	0	0	1	0	1	1	1	1	1	1	1	1	1	1	5	10	10	10	10	15	15	10	10
244	320673	1	15460568	2015-01-17	2015-01-22	5	0	0	73.5	primeiro grau	gastroenterológico	3	0	0	0	0	0	0	0	0	0	0	13.3	4	0	0	0	0	1	0	1	1	1	1	1	1	1	1	0	2	5	10	10	10	10	15	15	10	10
245	457839	1	15469368	2015-01-19	2015-01-22	3	0	0	75.9	primeiro grau	cardiovascular	3	0	0	0	0	0	1	0	0	0	1	12.4	6	0	0	0	0	1	1	1	1	1	1	1	1	1	1	0	1	5	10	5	10	10	15	15	10	10
246	787413	1	15482509	2015-01-20	2015-01-24	4	0	0	79	Segundo grau	infeccioso	2	0	0	1	0	0	0	0	0	0	0	12.1	2	0	0	0	0	1	1	1	1	1	1	1	1	1	1	1	0	5	10	10	10	10	15	15	10	10
247	1661564	1	15479906	2015-01-20	2015-01-21	1	0	0	60.1	superior	oncológico	2	0	0	1	0	0	0	0	0	0	0	11.4	4	1	0	0	0	0	1	1	1	1	1	1	1	1	1	1	0	5	10	10	10	10	15	15	10	10
248	1764749	2	15267089	2014-12-18	2014-12-22	4	0	0	83.6	superior	gastroenterológico	4	0	0	1	0	0	0	0	0	0	1	8.8	9	3	0	0	0	1	0	1	1	1	0	1	0	0	0	1	5	5	5	5	10	5	10	10	5	5
249	1054513	1	15258803	2014-12-17	2014-12-20	3	0	0	89.2	superior	ortopédico	4	0	0	0	0	0	0	1	0	0	0	14.2	5	1	0	1	5	1	2	2	2	2	2	2	2	2	2	2		5	5	5	10	5	10	10	5	5
250	1272691	1	15137225	2014-12-17	2014-12-27	10	0	0	68.6	superior	ortopédico	2	0	0	0	0	0	1	0	0	0	0	8.5	5	1	0	0	0	1	0	1	1	1	1	1	1	1	1	0	2	5	10	10	10	10	15	15	5	10
251	411744	1	15120991	2014-12-18	2014-12-19	1	0	0	61.7	superior	ortopédico	1	0	0	1	0	0	0	0	0	0	0	13.9	6	0	0	0	0	0	1	1	1	1	1	1	1	1	1	1	0	5	10	10	10	10	15	15	10	10
252	1468796	1	15264905	2014-12-18	2014-12-19	1	0	0	68.8	superior	ortopédico	2	0	0	0	0	0	0	0	0	0	0	12.1	4	0	0	1	5	0	1	1	1	1	1	1	1	1	1	1	0	5	10	5	10	10	15	15	10	10
253	390692	1	15395068	2015-01-10	2015-01-13	3	0	0	87.5	Segundo grau	neurológico	5	1	0	0	0	0	1	1	0	0	0	12.3	7	0	0	0	0	1	2	2	2	2	2	2	2	2	2	2		0	0	0	0	0	0	0	0	0
254	1773651	1	15287003	2015-01-10	2015-01-12	2	0	0	67.9	superior	oftalmológico	1	0	0	0	0	0	0	0	0	0	0	13.6	1	0	0	0	0	1	1	1	1	1	1	1	1	1	1	1	0	5	10	10	10	10	15	15	10	10
255	715118	1	15394072	2015-01-09	2015-01-13	4	0	0	87.4	primeiro grau	gastroenterológico	4	0	0	0	0	0	0	0	0	0	0	11.4	1	1	0	0	0	1	1	0	1	1	1	1	1	1	1	1	1	5	10	5	10	10	15	15	10	10
256	1409702	1	15290569	2015-01-11	2015-01-12	1	0	0	62.6	superior	ortopédico	2	0	0	0	0	0	0	0	0	0	0	13.7	3	0	0	0	0	0	1	1	1	1	1	1	1	1	1	1	0	5	10	10	10	10	15	15	10	10
257	552662	1	15396516	2015-01-09	2015-01-14	5	0	0	77.4	superior	infeccioso	1	0	0	0	0	0	0	0	0	0	0	11.4	1	0	0	0	0	1	1	1	1	1	1	1	1	1	1	0	1	5	10	10	10	10	15	15	10	10
258	832766	1	15406234	2015-01-11	2015-01-13	2	0	0	70.1	superior	ortopédico	3	0	0	1	0	0	0	0	0	0	0	14	6	0	0	1	5	1	1	1	1	1	1	1	1	1	1	1	0	5	10	10	10	10	15	15	10	10
259	327641	1	15406539	2015-01-11	2015-01-14	3	0	0	82.4	primeiro grau	ortopédico	1	0	0	0	0	0	0	0	0	0	0	13.7	2	0	0	1	5	0	1	1	1	1	1	1	1	1	1	1	0	5	10	10	10	10	15	15	10	10
260	701657	1	15397011	2015-01-09	2015-01-12	3	0	0	85.9	superior	hematológico	6	0	1	0	0	1	0	0	0	0	0	9.6	16	1	0	1	5	1	0	0	1	1	1	1	1	0	1	1	3	5	10	5	10	10	10	10	5	5
261	1770267	2	15401901	2015-01-10	2015-01-13	3	0	0	79.5	primeiro grau	reumatológico	1	0	0	0	0	0	0	0	0	0	0	14.2	0	0	0	0	0	1	1	1	1	1	1	1	1	1	1	1	0	5	10	10	10	10	15	15	10	10
262	761502	1	15405992	2015-01-11	2015-01-19	8	0	0	68.8	Segundo grau	gastroenterológico	5	0	0	1	0	0	1	0	0	0	0	11	9	1	0	0	0	1	1	1	1	1	1	1	1	1	1	1	0	5	10	10	10	10	15	15	10	10
263	365945	2	15406619	2015-01-11	2015-01-13	2	0	0	74.2	Superior	infeccioso	4	0	0	0	0	0	1	0	0	0	1	12.3	2	0	0	1	5	1	1	1	1	1	1	1	1	1	1	1	0	5	10	10	10	10	15	15	10	10
264	472271	2	15404899	2015-01-11	2015-01-14	3	0	0	69	Segundo grau	nefrológico	1	0	0	0	0	0	0	0	0	0	0	14.7	0	0	0	0	0	1	1	1	1	1	1	1	1	1	1	1	0	5	10	10	10	10	15	15	10	10
265	436694	2	15414623	2015-01-12	2015-01-19	7	0	0	81.5	Superior	infeccioso	4	0	0	1	0	0	1	0	0	0	0	9.8	14	0	0	0	0	1	0	1	1	1	1	1	1	1	1	1	1	5	10	0	10	10	10	10	10	5
266	490443	2	15425136	2015-01-13	2015-01-28	15	1	0	80.6	Superior	infeccioso	4	0	0	0	0	1	1	0	0	0	0	10.8	8	0	0	0	0	1	0	1	1	1	1	1	1	1	1	0	2	5	10	10	10	10	15	15	10	10
267	937459	1	15221487	2015-01-12	2015-01-17	5	0	0	64.6	Superior	oncológico	2	0	0	1	0	0	1	0	0	0	0	13.9	4	0	0	0	0	1	0	1	1	1	1	1	1	1	1	0	2	5	10	10	10	10	15	15	10	10
268	565083	2	15392841	2015-01-12	2015-01-15	3	0	0	77.4	Superior	urológico	3	0	0	1	0	0	0	0	0	0	1	14.8	6	1	0	0	0	1	1	1	1	1	1	1	1	1	1	1	0	5	10	5	10	10	15	15	10	10
269	510890	2	15415288	2015-01-12	2015-01-20	8	0	0	90.5	primeiro grau	infeccioso	5	0	0	1	0	0	0	0	0	0	0	11	14	1	1	0	0	1	2	2	2	2	2	2	2	2	2	2		0	5	5	10	5	10	10	5	5
270	779219	1	15407425	2015-01-12	2015-01-15	3	0	0	71.3	Superior	reumatológico	7	0	0	0	0	0	1	0	0	0	1	12.4	14	0	0	0	0	1	1	1	1	1	1	1	1	1	1	1	0	5	10	10	10	10	15	15	10	10
271	404891	1	15421268	2015-01-13	2015-01-16	3	0	0	74.6	Segundo grau	gastroenterológico	1	0	0	0	0	0	0	0	0	0	0	9.6	1	2	0	0	0	1	1	1	1	1	1	1	1	1	1	1	0	5	5	5	10	10	15	15	10	10
272	390692	1	15436078	2015-01-14	2015-02-02	19	1	0	87.5	Segundo grau	infeccioso	5	1	0	0	0	0	1	1	0	0	0	13.1	7	1	0	0	0	1	2	2	2	2	2	2	2	2	2	2		0	0	0	0	0	0	0	0	0
273	787854	2	15277850	2015-01-14	2015-01-19	5	0	0	61.6	Superior	gastroenterológico	3	0	0	0	0	0	0	0	0	0	0	15.2	2	1	0	0	0	1	1	1	1	1	1	1	1	1	1	1	0	5	10	10	10	10	15	15	10	10
274	592978	2	15429070	2015-01-14	2015-01-17	3	0	0	88.2	primeiro grau	infeccioso	2	0	0	0	0	0	0	1	0	0	0	13.6	15	5	0	0	0	0	2	2	2	2	2	2	2	2	2	2		0	10	10	5	5	5	10	5	0
275	312248	2	15431365	2015-01-14	2015-01-19	5	0	0	87.2	Segundo grau	infeccioso	3	0	0	0	0	0	1	0	0	0	0	12.1	6	0	0	0	0	1	1	1	1	1	0	1	1	1	1	1	1	5	10	10	10	10	15	15	10	10
276	600910	2	15424109	2015-01-14	2015-01-15	1	0	0	94	analfabeto	gastroenterológico	10	0	1	1	0	0	0	1	0	0	1	10.4	8	1	0	0	0	1	2	2	2	2	2	2	2	2	2	2		0	10	10	10	10	10	10	5	5
277	486047	1	15439528	2015-01-15	2015-01-16	1	0	0	66	Segundo grau	ortopédico	2	0	0	0	0	0	0	0	0	0	0	14.1	2	1	0	0	0	0	1	1	1	1	1	1	1	1	1	0	1	5	10	10	10	10	15	15	10	10
278	568311	2	15423302	2015-01-13	2015-01-17	4	0	0	79.8	Superior	dermatológico	5	0	0	0	0	1	0	0	0	0	0	12.9	3	0	0	0	0	1	0	1	1	1	1	1	1	1	1	1	1	5	10	5	10	10	15	15	10	10
279	301105	2	15445041	2015-01-15	2015-01-18	3	0	0	68.5	Superior	infeccioso	1	0	0	0	0	0	0	0	0	0	0	16	1	0	0	0	0	1	1	1	1	1	1	1	1	1	1	1	0	5	10	10	10	10	15	15	10	10
280	546787	2	15430588	2015-01-14	2015-01-17	3	0	0	90	Superior	cardiovascular	3	0	0	0	0	1	0	0	0	0	0	14.4	8	0	0	0	0	0	1	1	1	1	1	1	1	1	1	1	0	5	10	5	10	10	15	10	5	5
281	1082203	2	15439640	2015-01-15	2015-01-28	13	0	0	77.6	Segundo grau	ortopédico	6	0	0	0	0	1	1	0	0	0	0	15.3	9	1	0	1	5	1	0	1	1	1	1	1	1	1	1	1	1	5	10	10	10	10	15	15	10	10
282	1731917	1	15443249	2015-01-15	2015-02-05	21	1	0	72.3	Superior	infeccioso	3	0	0	0	0	0	1	0	0	0	0	11.4	6	1	0	0	0	1	1	0	1	1	1	1	1	1	1	1	1	5	10	10	10	10	15	10	10	5
283	450097	1	15520287	2015-01-24	2015-01-27	3	0	0	71.4	Superior	gastroenterológico	5	0	0	1	0	0	0	0	0	0	0	17.1	4	0	0	0	0	1	0	1	1	1	1	1	1	1	1	1	1	5	10	10	10	10	15	15	10	10
284	702353	1	15532157	2015-01-26	2015-01-31	5	0	0	87.6	primeiro grau	ortopédico	2	0	0	0	0	0	0	0	0	0	0	12.4	8	0	0	0	0	0	0	0	1	0	0	0	0	1	0	1	7	5	10	10	10	10	10	10	0	5
285	335478	1	15498930	2015-02-09	2015-02-11	2	0	0	64.7	Superior	pulmonar	3	0	0	1	0	0	1	0	0	0	0	12.6	2	0	0	0	0	1	1	1	1	1	1	1	1	1	1	0	1	5	10	10	10	10	15	15	10	10
286	542986	2	15654368	2015-02-09	2015-02-11	2	0	0	87.4	primeiro grau	gastroenterológico	4	0	0	0	0	0	0	0	0	0	1	13	3	1	0	0	0	1	0	1	1	1	1	1	1	1	1	0	2	5	10	5	10	10	15	15	10	10
287	592130	2	15648087	2015-02-08	2015-02-11	3	0	0	68.8	Superior	gastroenterológico	4	0	0	0	0	0	0	0	0	0	1	14	5	0	0	0	0	1	1	1	1	1	1	1	1	1	1	1	0	5	10	10	10	10	15	15	10	10
288	302207	1	15654488	2015-02-09	2015-02-13	4	0	0	89.9	Segundo grau	gastroenterológico	5	0	0	0	0	0	0	0	0	0	0	13.5	6	0	0	0	0	1	0	1	1	1	1	1	1	1	1	1	1	5	10	10	10	10	15	15	10	10
289	540432	1	15649519	2015-02-08	2015-02-11	3	0	0	65.3	Superior	infeccioso	2	0	0	0	0	0	0	0	0	0	0	11.7	12	1	0	0	0	0	0	1	1	1	1	1	1	1	1	1	1	5	10	10	10	10	15	15	10	10
290	501345	2	15643851	2015-02-07	2015-03-09	30	1	0	81.3	Superior	infeccioso	2	0	0	1	0	0	0	1	0	0	0	13	5	0	0	0	0	1	2	2	2	2	2	2	2	2	2	2		0	0	0	0	0	10	10	0	5
291	778597	1	15649134	2015-02-08	2015-02-11	3	0	0	71.4	Superior	cardiovascular	3	0	0	0	0	1	1	0	0	0	0	13.9	5	0	0	0	0	1	0	1	1	1	1	1	1	1	1	0	2	5	10	5	10	10	15	15	10	10
292	414595	1	15645119	2015-02-07	2015-02-15	8	0	0	64.7	Segundo grau	infeccioso	2	0	0	0	0	0	0	0	0	0	0	12.7	4	0	0	0	0	0	0	1	1	1	1	1	1	1	1	1	1	5	10	10	10	10	15	15	10	10
293	328973	2	15520712	2015-01-24	2015-02-01	8	0	0	69.8	Superior	cardiovascular	2	0	0	0	0	0	1	0	0	0	0	13.1	0	0	0	0	0	1	1	0	1	1	1	1	1	1	1	0	2	5	10	10	10	10	15	15	10	10
294	1604683	2	15466054	2015-01-26	2015-01-27	1	0	0	68.4	primeiro grau	gastroenterológico	1	0	0	0	0	0	0	0	0	0	0	12.6	1	1	0	0	0	0	1	0	1	1	1	1	1	1	1	1	1	5	10	10	10	10	15	15	10	10
295	444794	2	15511794	2015-01-26	2015-01-27	1	0	0	70.6	superior	gastroenterológico	4	0	0	0	0	0	1	0	0	0	1	14.3	8	0	0	0	0	1	1	1	1	1	1	1	1	1	1	1	0	5	10	10	10	10	15	15	10	10
296	1781151	1	15531235	2015-01-26	2015-01-27	1	0	0	69	superior	metabólico	2	0	0	0	0	0	0	0	0	0	0	13.5	8	0	0	1	5	0	1	1	1	1	1	1	1	1	1	0	1	5	10	10	10	10	15	15	10	10
297	1061748	2	15523907	2015-01-25	2015-01-28	3	0	0	69.1	primeiro grau	infeccioso	4	1	0	1	0	1	0	0	0	0	0	14	9	1	0	0	0	1	1	1	1	1	1	1	1	1	1	0	1	5	10	10	10	10	15	15	10	10
298	374470	2	15432217	2015-01-26	2015-01-31	5	0	0	70.7	superior	cardiovascular	5	0	0	0	0	0	1	0	0	0	1	14.8	9	1	0	0	0	1	1	1	1	1	1	1	1	1	1	1	0	5	10	10	10	10	15	15	10	10
299	1389261	2	15535900	2015-01-27	2015-01-28	1	0	0	68.9	superior	cardiovascular	2	0	0	0	0	0	0	0	0	0	1	14.3	4	0	0	0	0	1	1	1	1	1	1	1	1	1	1	1	0	5	10	10	10	10	15	15	10	10
300	475305	1	15522510	2015-01-25	2015-02-02	8	0	0	68	Segundo grau	infeccioso	2	0	0	1	0	0	0	0	0	0	0	11	9	2	0	0	0	1	1	1	1	1	1	1	1	1	1	1	0	5	10	10	10	10	15	15	10	10
301	802480	1	15532088	2015-01-26	2015-01-31	5	0	1	85.1	primeiro grau	infeccioso	7	1	0	0	0	1	1	1	0	0	0	14.1	9	0	0	0	0	1	2	2	2	2	2	2	2	2	2	2		0	10	10	5	5	10	10	5	5
302	530799	2	15640616	2015-02-07	2015-02-10	3	0	0	74.9	Segundo grau	cardiovascular	4	0	0	0	1	1	1	0	0	0	0	13.1	5	4	0	0	0	1	1	1	1	0	1	0	0	0	1	1	4	5	10	10	10	10	15	10	10	0
303	367559	2	15648210	2015-02-06	2015-02-13	7	0	0	73.1	superior	neurológico	3	1	0	1	0	0	0	0	0	0	0	16	5	1	0	0	0	0	1	0	1	1	1	1	1	1	1	1	1	5	5	10	10	10	15	15	10	10
304	700827	2	16345095	2015-04-27	2015-04-29	2	0	0	60.3	superior	nefrológico	1	0	0	0	0	0	1	0	0	0	0	15	4	1	0	0	0	1	1	1	1	1	1	1	1	1	1	1	0	5	10	10	10	10	15	15	10	10
305	1748069	2	16069770	2015-04-05	2015-04-08	3	0	0	64.7	superior	oncológico	3	0	0	1	0	0	1	0	0	0	0	12.1	5	0	0	1	1	1	1	1	1	1	1	1	1	1	1	0	1	5	10	5	10	10	15	15	10	10
306	1802691	1	16229367	2015-04-14	2015-04-17	3	0	0	74.3	primário	infeccioso	3	0	0	0	0	0	1	0	0	0	0	15.1	2	0	0	0	0	1	1	0	1	1	0	1	1	1	1	1	2	5	10	10	10	10	15	15	10	10
307	1764286	1	16137895	2015-04-13	2015-04-17	4	0	0	60.5	superior	transplante	1	0	0	0	0	0	0	0	0	0	0	12.7	1	0	0	0	0	1	1	0	1	1	1	1	1	1	1	1	1	5	10	5	10	10	15	15	10	10
308	1218273	1	16204252	2015-04-14	2015-04-19	5	0	0	72.3	primário	gastroenterológico	3	0	0	0	0	0	0	0	0	0	0	14.4	8	0	0	1	1	1	1	1	1	1	1	1	1	1	1	1	0	5	10	10	10	10	15	15	10	10
309	384400	1	16107595	2015-03-31	2015-04-07	7	0	0	87.5	superior	infeccioso	6	0	0	0	0	0	0	1	0	0	0	12.2	14	0	0	0	0	1	0	1	1	1	1	1	1	1	0	1	1	5	10	0	10	10	15	15	5	5
310	317276	1	16298679	2015-04-22	2015-04-26	4	0	0	72.6	superior	infeccioso	3	0	0	0	0	0	1	0	0	0	0	12.8	5	0	0	0	0	1	1	1	1	1	1	1	1	1	1	1	0	5	10	10	10	10	15	10	10	5
311	1439758	2	16287274	2015-04-20	2015-04-25	5	0	0	64.9	Segundo grau	infeccioso	3	0	0	0	0	0	0	0	0	0	0	12.5	2	0	0	0	0	0	1	1	1	1	1	1	1	1	1	1	0	5	10	5	10	10	15	15	10	10
312	426893	2	16327907	2015-04-26	2015-04-30	4	0	0	77.8	Superior	urológico	2	0	0	0	0	0	0	0	0	0	0	13.6	3	1	0	0	0	0	1	1	1	1	1	1	1	0	1	1	1	5	10	10	10	10	15	15	10	10
313	464191	2	16273561	2015-04-24	2015-04-28	4	0	0	78.7	Superior	oncológico	4	0	0	1	0	0	0	0	0	0	0	9.7	2	0	0	0	0	0	1	1	1	1	1	1	1	1	0	1	1	5	10	10	10	10	15	15	10	10
314	500619	2	16306042	2015-04-24	2015-04-28	4	0	0	63.3	Superior	oncológico	1	0	0	0	0	0	0	0	0	0	0	12.6	1	0	0	0	0	1	1	1	1	1	1	1	1	1	1	1	0	5	10	10	10	10	15	10	10	10
315	1174693	2	16335052	2015-04-26	2015-04-30	4	0	0	62.9	Superior	nefrológico	2	0	0	0	0	0	0	0	0	0	0	15.6	5	0	0	0	0	1	1	1	1	1	1	1	1	1	1	1	0	5	5	5	10	10	15	10	10	5
316	745445	1	16319736	2015-04-24	2015-04-28	4	0	0	76.5	Segundo grau	infeccioso	4	0	0	0	0	0	0	0	0	0	0	14	3	0	0	0	0	0	0	1	1	1	1	1	1	1	1	1	1	5	10	10	10	10	15	15	10	10
317	727593	2	16303107	2015-04-23	2015-04-25	2	0	0	75.4	Superior	cardiovascular	2	0	0	0	0	1	0	0	0	0	0	13.7	7	2	0	0	0	1	1	1	1	1	1	1	1	1	1	1	0	5	10	10	10	10	15	15	10	10
318	598299	2	16303521	2015-04-22	2015-04-25	3	0	0	66.4	Superior	oncológico	1	0	0	1	0	0	0	0	0	0	0	13.4	1	0	0	0	0	0	0	1	1	1	1	1	1	1	1	1	1	5	10	10	10	10	15	15	10	10
319	1804700	1	16297044	2015-04-22	2015-05-05	13	0	0	68.4	Superior	neurológico	3	1	0	0	0	0	1	0	0	0	0	13.8	4	0	0	0	0	0	1	1	1	1	1	1	1	1	1	1	0	5	10	10	10	10	15	15	10	10
320	852610	1	16285887	2015-04-20	2015-04-23	3	0	0	71.2	superior	neurológico	2	0	0	0	0	0	0	0	0	0	0	13.3	4	1	0	0	0	0	1	1	1	1	1	1	1	1	1	1	0	5	10	10	10	10	15	15	10	10
321	1804746	1	16302174	2015-04-22	2015-04-30	8	0	0	69.1	Superior	neurológico	1	0	0	0	0	0	0	0	0	0	0	12.7	3	2	0	1	1	1	0	1	1	1	1	1	1	1	1	1	1	5	10	10	10	10	15	15	10	10
322	356157	1	16286865	2015-04-10	2015-04-23	13	0	0	76.7	Superior	neurológico	4	0	0	0	0	0	0	0	0	0	0	13.7	3	0	0	1	2	0	1	1	1	1	1	1	1	1	1	1	0	5	10	5	10	10	15	15	10	10
323	567134	1	16033896	2015-03-24	2015-03-28	4	0	0	89.1	Segundo grau	infeccioso	5	0	0	0	0	1	0	0	0	0	0	12.5	9	0	0	0	0	1	1	1	1	1	1	1	0	0	1	1	2	5	5	5	10	5	10	10	5	5
324	448740	1	16031969	2015-03-23	2015-03-25	2	0	0	65.2	Segundo grau	infeccioso	7	0	0	0	0	0	0	0	0	0	0	13.9	2	1	1	0	0	1	0	1	1	1	1	1	1	1	1	1	1	5	10	10	10	10	15	15	10	10
325	1030249	2	16260371	2015-04-16	2015-04-25	9	0	0	82.3	Superior	infeccioso	6	0	0	0	0	0	0	0	0	0	0	12.5	11	1	1	0	0	1	2	2	2	2	2	2	2	2	2	2		0	10	0	5	0	0	0	0	0
326	1492942	2	16225048	2015-04-16	2015-04-19	3	0	0	61.8	Segundo grau	oncológico	1	0	0	1	0	0	0	0	0	0	0	10.9	0	0	0	0	0	0	0	1	1	0	1	1	1	1	0	1	3	5	10	10	10	10	15	15	10	10
327	441727	2	16249307	2015-04-16	2015-04-23	7	0	0	77	primário	infeccioso	6	1	0	1	0	0	0	0	0	0	0	13.6	10	2	0	1	1	1	1	0	1	1	1	1	1	1	1	1	1	5	5	0	10	10	15	15	10	10
328	479325	1	16232542	2015-04-14	2015-04-24	10	0	0	64.4	Segundo grau	infeccioso	4	1	0	0	0	0	0	0	0	0	0	11.9	15	2	0	1	3	0	0	1	1	1	1	1	1	1	1	1	1	5	10	10	10	10	10	15	10	10
329	965429	1	16236924	2015-04-14	2015-04-17	3	0	0	75.3	superior	infeccioso	3	0	0	0	0	0	1	0	0	0	0	12.7	5	1	0	1	3	0	1	0	1	1	1	1	1	1	1	0	2	5	10	5	10	10	15	15	10	10
330	1706876	2	16136997	2015-04-13	2015-04-21	8	0	0	64.4	Superior	transplante	4	0	0	0	1	1	0	0	0	0	0	11.6	0	0	0	1	1	0	1	1	1	1	1	1	1	1	1	1	0	5	10	0	10	10	15	15	10	10
331	859247	2	16072390	2015-04-13	2015-04-15	2	0	0	63.2	Superior	oncológico	3	0	0	1	0	0	0	0	0	0	0	12.8	5	0	0	0	0	1	1	1	1	1	1	1	1	1	1	1	0	0	10	10	10	10	15	15	10	10
332	1727069	2	16102875	2015-04-13	2015-04-15	2	0	0	71.6	Segundo grau	oncológico	1	0	0	1	0	0	0	0	0	0	0	9.6	2	0	0	0	1	1	1	1	1	1	1	1	1	1	1	1	0	5	10	10	10	10	15	15	10	10
333	1791719	2	16092302	2015-04-13	2015-04-17	4	0	0	60.7	Superior	oncológico	3	0	0	1	0	0	0	0	0	0	0	13.3	2	0	0	0	0	1	1	1	1	1	1	1	1	1	1	1	0	5	10	10	10	10	15	15	10	10
334	315238	2	16198560	2015-04-10	2015-04-15	5	0	0	62.6	Superior	infeccioso	4	0	0	0	0	0	0	0	1	0	0	10.5	9	0	0	0	0	1	0	0	1	1	1	1	1	1	1	1	2	5	10	10	0	10	15	15	10	5
335	1401827	2	16210981	2015-04-12	2015-04-15	3	0	0	78.1	Superior	infeccioso	5	0	1	0	1	1	1	0	0	0	0	11.3	14	2	0	0	0	1	1	1	1	1	1	1	1	1	1	1	0	5	10	5	10	10	15	15	5	5
336	1238730	1	16309286	2015-04-12	2015-04-15	3	0	0	71.2	Segundo grau	infeccioso	5	1	0	0	0	0	1	0	0	0	0	13.9	5	0	0	0	0	1	1	1	1	1	1	1	1	1	1	1	0	5	10	5	10	10	15	15	10	10
337	398589	2	16208897	2015-04-12	2015-04-14	2	0	0	74.3	Superior	neurológico	3	0	0	0	0	0	0	0	0	0	0	13.5	7	1	0	0	0	1	1	1	1	1	1	1	1	1	1	1	0	5	10	5	10	10	10	15	10	5
338	999726	2	16206116	2015-04-11	2015-04-18	7	0	0	61.4	primário	infeccioso	3	0	0	0	0	0	1	0	0	0	0	10.6	4	1	0	0	0	1	1	1	1	0	1	1	1	1	1	1	1	0	0	5	5	0	5	0	0	5
339	1791461	1	16012928	2015-03-23	2015-03-26	3	0	0	84.1	primário	gastroenterológico	4	0	0	1	0	0	0	0	0	0	0	11.6	0	0	0	0	0	1	0	1	1	0	1	1	1	0	1	1	3	5	10	10	10	10	10	15	10	10
340	1085882	2	16029674	2015-03-24	2015-03-27	3	0	0	75.6	Superior	gastroenterológico	4	0	0	0	0	0	0	0	0	0	0	14.4	4	0	0	0	0	0	1	0	1	1	1	1	1	1	1	1	1	5	10	10	10	10	15	15	10	10
341	603942	1	16311243	2015-04-23	2015-04-26	3	0	0	71	Superior	gastroenterológico	2	0	0	0	0	0	1	0	0	0	0	14.1	2	1	0	0	0	1	1	1	1	1	1	1	1	1	1	1	0	5	10	10	10	10	15	15	10	10
342	574533	2	16336035	2015-04-26	2015-04-28	2	0	0	68.5	Superior	gastroenterológico	4	0	0	0	0	0	0	0	0	0	0	12.8	9	0	0	0	0	0	1	1	1	1	1	1	1	1	1	1	0	5	10	10	10	10	15	15	10	10
343	1098626	1	16322474	2015-04-24	2015-04-28	4	0	0	78.6	Segundo grau	neurológico	2	0	0	0	0	0	0	0	0	0	0	11.8	6	1	0	1	1	1	0	1	1	0	0	1	0	0	1	0	6	5	10	5	5	5	10	10	10	5
344	881444	1	16320859	2015-04-24	2015-05-03	9	0	0	83.4	Segundo grau	ortopédico	2	0	0	0	0	0	0	0	0	0	0	12.5	3	1	0	1	5	0	1	1	1	1	1	1	1	1	1	1	0	5	10	5	10	10	15	5	10	5
345	1333049	1	16305534	2015-04-23	2015-04-25	2	0	0	62.7	segundo grau	cardiovascular	1	0	0	0	0	0	0	0	0	0	0	14.4	7	0	0	0	0	1	0	1	1	1	1	1	1	1	1	1	1	5	10	10	10	10	15	15	10	10
346	566389	2	16095805	2015-03-30	2015-04-03	4	0	0	75.5	segundo grau	pulmonar	4	0	1	0	0	0	0	0	0	0	0	13.7	6	0	0	0	0	1	0	1	1	1	1	1	1	1	1	1	1	5	10	5	10	10	15	15	10	10
347	466575	2	16106369	2015-03-31	2015-04-03	3	0	0	87.8	primário	pulmonar	4	0	0	0	1	1	1	0	0	0	0	11.5	7	3	0	0	0	1	0	1	1	1	1	1	1	1	1	1	1	5	10	10	5	10	15	15	10	5
348	1029736	1	16116153	2015-04-01	2015-04-10	9	0	0	87.4	segundo grau	infeccioso	3	1	0	0	0	0	0	0	0	0	0	14.1	3	0	1	1	1	1	2	2	2	2	2	2	2	2	2	2		0	0	0	0	0	0	0	0	0
349	1091848	1	16141536	2015-04-05	2015-04-06	1	0	0	62.4	segundo grau	urológico	3	0	0	0	0	0	0	0	0	0	0	12.3	4	0	0	0	0	1	1	1	1	1	1	1	1	1	1	0	1	5	10	5	10	10	15	15	10	10
350	370814	1	16140599	2015-04-05	2015-04-14	9	0	0	75.2	segundo grau	infeccioso	2	0	0	0	0	0	0	0	0	0	0	11.5	6	3	0	0	0	1	1	1	1	1	1	1	1	1	1	1	0	5	10	10	10	10	15	15	10	10
351	366842	2	16036457	2015-04-06	2015-04-09	3	0	0	61.6	superior	gastroenterológico	6	1	0	0	0	0	0	0	0	0	0	13.1	14	1	0	0	0	1	0	0	1	1	1	1	1	1	1	0	3	5	10	10	10	10	15	15	10	10
352	1263822	2	16155820	2015-04-06	2015-04-08	2	0	0	88.2	superior	gastroenterológico	3	0	0	0	0	1	0	0	0	0	0	13.8	6	3	0	1	1	1	0	1	1	1	1	1	1	1	1	1	1	5	10	10	10	10	10	10	10	10
353	608345	1	16144405	2015-04-05	2015-04-09	4	0	0	67.4	superior	gastroenterológico	3	0	0	0	0	0	0	0	0	0	0	12.5	3	1	0	0	0	1	1	1	1	1	1	1	1	1	1	1	0	5	10	10	10	10	15	15	10	10
354	741632	2	16152696	2015-04-06	2015-04-08	2	0	0	75.7	superior	renal	2	0	0	0	0	0	0	0	0	0	0	15.1	5	0	0	0	0	1	1	1	1	1	1	1	1	1	1	0	1	5	10	10	10	10	15	15	10	10
355	523710	2	16153747	2015-04-06	2015-04-12	6	0	0	65.7	superior	gastroenterológico	3	0	0	0	0	0	0	0	1	0	0	13.4	8	1	0	0	0	1	1	1	1	1	1	1	1	1	1	1	0	0	5	0	10	10	10	10	5	5
356	327425	1	16312214	2015-04-23	2015-04-26	3	0	0	69.5	segundo grau	gastroenterológico	5	0	0	0	0	0	1	0	0	0	0	11.9	7	2	0	1	1	1	1	1	1	1	1	1	1	1	1	1	0	5	5	5	10	10	15	15	10	10
357	1035545	2	16211304	2015-04-12	2015-04-19	7	0	0	67.1	segundo grau	infeccioso	4	0	0	0	0	0	1	0	0	0	0	12.8	7	1	0	1	3	0	0	1	1	1	0	1	1	1	0	0	4	5	10	5	10	10	15	15	10	10
358	356110	2	16217989	2015-04-13	2015-04-17	4	0	0	67	segundo grau	dermatológico	1	0	0	0	0	0	0	0	0	0	0	16	0	0	0	0	0	1	1	1	1	1	1	1	1	1	1	1	0	5	10	10	10	10	15	15	10	10
359	1800958	2	16173822	2015-04-12	2015-04-14	2	0	0	69.6	segundo grau	urológico	4	0	0	1	0	0	0	0	0	0	0	13.5	3	0	0	0	0	0	1	1	1	1	1	1	1	1	1	1	0	5	10	10	10	10	15	15	10	10
360	498792	1	16207145	2015-04-11	2015-04-22	11	0	0	81.6	primário	gastroenterológico	5	0	0	0	0	0	0	0	0	0	0	9.6	12	0	0	1	3	1	0	0	1	1	1	1	1	1	1	1	2	5	10	5	10	10	15	15	10	10
361	999726	2	16206116	2015-04-11	2015-04-18	7	0	0	61.4	segundo grau	infeccioso	4	0	0	0	1	0	0	0	0	0	0	11.6	7	1	0	0	0	1	1	1	1	0	1	1	1	1	1	1	1	0	10	0	0	0	0	5	0	0
362	713596	2	16082991	2015-03-28	2015-04-05	8	0	0	68.1	segundo grau	infeccioso	2	0	0	1	0	0	0	0	0	0	0	9	8	2	0	0	0	1	1	1	1	1	1	1	1	1	1	1	0	5	10	10	10	10	15	15	10	10
363	1323961	2	16083554	2015-03-28	2015-04-01	4	0	0	71.4	superior	gastroenterológico	3	0	1	1	0	0	0	0	0	0	0	12.3	14	0	0	0	0	1	0	1	1	1	1	1	1	1	1	1	1	5	10	10	10	10	15	15	10	10
364	398325	2	16085417	2015-03-29	2015-04-11	13	0	0	61.9	Superior	infeccioso	3	0	0	0	0	0	1	0	0	0	0	11	6	0	0	0	0	1	1	1	1	1	1	1	1	1	1	1	0	5	10	10	10	10	15	15	10	10
365	1292465	1	16099029	2015-03-30	2015-04-01	2	0	0	66.1	Superior	gastroenterológico	3	0	0	0	0	0	0	0	0	0	0	11.6	4	0	0	0	0	0	1	1	1	1	1	1	1	1	1	1	0	5	10	10	10	10	15	15	10	10
366	856311	2	16236577	2015-04-14	2015-04-16	2	0	0	67.9	Superior	gastroenterológico	2	0	0	0	0	0	0	0	0	0	0	14.9	3	0	0	0	0	0	1	1	1	1	1	1	1	1	1	1	0	5	10	10	10	10	15	15	10	10
367	1174863	1	16087961	2015-03-29	2015-03-31	2	0	0	73.2	segundo grau	gastroenterológico	3	0	0	0	0	0	0	0	0	0	0	11.5	1	1	0	1	1	1	0	0	1	1	1	1	0	1	1	0	4	5	10	10	10	10	15	15	10	10
368	1771391	2	16347201	2015-04-27	2015-04-28	1	0	0	66.6	segundo grau	gastroenterológico	2	0	0	1	0	0	0	0	1	0	0	15.1	0	2	0	0	0	0	0	1	1	1	1	1	1	1	0	1	2	5	10	10	10	10	15	10	10	5
369	479764	2	16302618	2015-04-22	2015-04-25	3	0	0	84.6	Superior	neurológico	3	0	0	0	0	0	0	0	0	0	0	14.4	8	0	0	1	1	1	0	1	1	1	1	1	1	1	1	0	2	5	10	5	10	5	10	10	10	5
370	738470	1	16316926	2015-04-23	2015-04-27	4	0	0	72	superior	gastroenterológico	1	0	0	1	0	0	0	0	0	0	0	14.6	2	0	0	0	0	1	1	1	1	1	1	1	1	1	1	1	0	5	10	10	10	10	15	15	10	10
371	1668226	2	16300243	2015-04-23	2015-04-26	3	0	0	69.2	segundo grau	urológico	3	0	0	1	0	0	0	0	0	0	0	13.5	6	0	0	0	0	0	0	1	1	1	1	1	1	1	1	1	1	5	10	0	10	10	15	15	10	10
372	1727998	1	16341944	2015-04-27	2015-04-29	2	0	0	89.3	segundo grau	infeccioso	4	0	0	0	0	0	0	0	0	0	0	12.9	6	2	0	0	0	1	0	1	1	1	1	1	1	1	1	1	1	5	10	10	10	10	15	15	10	10
373	495708	2	16331386	2015-04-25	2015-05-01	6	0	0	67.7	Superior	infeccioso	4	0	0	1	0	0	1	0	0	0	0	9.8	7	4	0	0	0	0	1	1	1	1	1	1	1	1	1	1	0	5	10	10	10	10	15	15	10	10
374	348057	1	16343006	2015-04-27	2015-04-30	3	0	0	63.8	Superior	infeccioso	2	0	0	0	0	0	0	0	0	0	0	12.6	3	0	0	0	1	0	1	1	1	1	1	1	1	1	1	1	0	5	10	10	10	10	15	15	10	10
375	1649411	2	16314561	2015-04-23	2015-07-18	86	1	1	72.5	segundo grau	infeccioso	2	0	0	0	0	0	1	0	0	0	0	12	5	1	0	0	0	1	0	0	1	0	1	1	1	1	0	1	4	5	5	0	10	0	15	15	10	10
376	890686	2	16314641	2015-04-23	2015-04-26	3	0	0	62.2	primeiro grau	oftalmológico	4	0	0	0	0	0	0	0	0	0	0	11.5	9	0	0	0	0	1	0	1	1	1	1	1	1	1	1	1	0	5	10	10	10	10	15	15	10	10
377	551998	1	16267845	2015-04-22	2015-04-29	7	0	0	64.1	superior	infeccioso	5	0	0	1	0	0	0	0	0	0	0	14.3	10	0	0	1	2	0	1	1	1	1	1	1	1	1	1	1	0	5	10	10	10	10	15	15	10	10
378	1137338	2	16091077	2015-04-10	2015-04-14	4	0	0	68	superior	urológico	2	0	0	1	0	0	0	0	0	0	0	9.3	2	0	0	0	0	0	1	1	1	1	1	1	1	1	1	1	1	5	0	0	10	10	15	15	10	10
379	362132	2	16244655	2015-04-15	2015-04-26	11	0	1	65.3	superior	pulmonar	4	0	0	1	0	0	1	0	0	0	0	12	10	1	0	0	0	1	0	1	1	1	1	1	1	1	1	1	1	5	10	10	10	10	15	15	10	10
380	1115797	2	16126590	2015-04-15	2015-04-18	3	0	0	73.9	Superior	ortopédico	3	0	0	0	0	0	0	0	0	0	0	14.1	1	0	0	0	0	1	1	1	1	1	1	1	1	1	1	1	0	5	10	10	10	10	15	15	10	10
381	1309604	2	16248916	2015-04-15	2015-04-20	5	0	0	88	segundo grau	neurológico	2	0	0	1	0	0	0	0	0	0	0	11.8	5	2	0	1	7	1	1	1	1	1	1	1	1	1	1	1	0	5	10	10	10	10	15	10	5	5
382	570372	1	16351242	2015-04-27	2015-05-05	8	0	0	71.5	segundo grau	gastroenterológico	3	0	0	1	0	0	1	0	0	0	0	14.6	3	0	0	0	0	1	1	1	1	1	1	1	1	1	1	1	0	5	10	10	10	10	15	15	10	10
383	1767392	2	16102987	2015-04-14	2015-04-22	8	0	0	74.3	segundo grau	urológico	1	0	0	1	0	0	0	0	0	0	0	12.6	2	0	0	0	0	0	1	1	1	1	1	1	1	1	1	1	0	5	10	10	10	10	15	15	10	10
384	403679	1	16235625	2015-04-14	2015-04-23	9	0	0	71.7	segundo grau	infeccioso	4	0	0	0	0	0	0	0	0	0	0	14.9	9	2	0	0	0	1	2	2	2	2	2	2	2	2	2	2		0	0	0	0	0	0	0	0	0
385	1173729	1	16176836	2015-04-14	2015-04-15	1	0	0	78.2	primeiro grau	gastroenterológico	5	0	0	0	0	0	0	0	0	0	0	11.5	6	0	0	0	0	1	0	1	1	1	1	1	1	1	1	1	0	5	10	5	10	10	15	15	10	5
386	603714	1	16232932	2015-04-14	2015-04-20	6	0	0	88	segundo grau	ortopédico	5	0	0	0	0	0	0	1	0	0	0	10.9	6	0	0	0	0	1	2	2	2	2	2	2	2	2	2	2		0	0	0	0	0	0	0	0	0
387	605388	1	16134500	2015-04-03	2015-04-17	14	0	0	80	Superior	infeccioso	2	0	0	0	0	0	0	0	0	0	0	10.2	13	4	0	0	0	1	0	0	1	1	1	1	1	1	1	0	3	0	0	5	10	5	5	10	5	5
388	1447194	1	16399182	2015-05-04	2015-05-07	3	0	0	61.8	segundo grau	gastroenterológico	5	0	0	0	0	0	0	0	1	0	0	8	3	1	0	0	0	1	1	0	1	1	1	1	1	1	1	1	1	5	5	5	10	10	15	15	10	10
389	1591609	2	16389475	2015-05-02	2015-05-07	5	0	0	64	primário	infeccioso	4	0	0	0	0	0	0	0	1	0	0	9.7	5	1	0	0	0	1	0	1	1	1	1	1	1	1	1	1	1	5	10	10	10	10	15	15	10	10
390	1700995	2	16385592	2015-05-02	2015-05-09	7	0	0	60.5	segundo grau	transplante	5	0	0	0	0	0	0	0	1	0	0	9.2	6	0	0	0	0	0	1	1	1	1	1	1	1	1	1	1		5	10	10	10	10	15	15	10	10
391	1566986	2	16344682	2015-04-27	2015-05-02	5	0	0	64.8	segundo grau	infeccioso	3	0	0	0	0	0	1	0	0	0	0	8.3	6	7	0	1	2	1	1	0	1	1	1	1	1	1	0	0	3	5	10	10	10	10	15	15	5	10
392	406773	2	16357267	2015-04-28	2015-05-13	15	1	0	75.8	Superior	oncológico	6	0	0	1	0	0	0	0	0	0	0	9.4	12	2	0	0	0	1	1	1	1	1	1	1	1	1	1	1	0	5	10	10	10	10	15	15	10	10
393	794561	2	16308793	2015-05-01	2015-05-05	4	0	0	64.8	superior	urológico	3	0	0	0	0	0	1	0	1	0	0	14.1	10	0	0	0	0	1	1	1	1	1	1	1	1	1	1	1	0	5	5	5	10	10	15	15	10	10
394	307630	1	16380593	2015-05-01	2015-05-13	12	0	0	73.7	segundo grau	infeccioso	2	0	0	0	0	0	0	0	0	0	0	11.8	4	1	0	0	0	1	2	2	2	2	2	2	2	2	2	2		0	0	0	0	0	0	0	0	0
395	328317	1	16393618	2015-05-03	2015-05-07	4	0	0	72.3	superior	neurológico	2	0	0	0	0	0	0	0	0	0	0	13.5	19	2	0	1	4	1	0	0	1	1	1	1	1	1	1	1	2	5	10	10	10	10	15	15	10	5
396	327003	1	16358104	2015-05-01	2015-05-05	4	0	0	73.2	segundo grau	gastroenterológico	4	0	0	0	0	0	0	0	0	0	0	11.8	13	1	0	0	0	0	0	0	1	1	1	1	1	1	1	1	2	5	0	10	10	10	15	15	10	5
397	761731	1	16386909	2015-05-02	2015-05-06	4	0	0	80	superior	gastroenterológico	2	0	0	0	0	0	0	0	0	0	0	13	6	2	0	0	0	1	1	1	1	1	1	1	1	1	1	1		5	0	10	10	10	15	15	10	5
398	963032	2	16389444	2015-05-02	2015-05-05	3	0	0	69.4	superior	endocrinológico	1	0	0	0	0	0	1	0	0	0	0	13.8	0	0	0	1	1	0	1	1	1	1	1	1	1	1	1	1	0	5	10	10	10	10	15	15	10	10
399	1252303	1	16380690	2015-05-01	2015-05-05	4	0	0	89.2	primário	infeccioso	2	0	0	0	0	1	0	0	0	0	0	11.6	2	0	0	0	0	0	2	2	2	2	2	2	2	2	2	2		5	10	5	10	10	15	15	10	10
400	542986	2	16410101	2015-05-05	2015-05-14	9	0	0	87.6	primário	infeccioso	3	0	0	0	0	0	0	0	0	0	0	12.2	3	1	0	0	0	1	0	1	1	0	1	1	1	1	1	1	2	5	10	10	10	10	15	15	10	10
401	1035448	2	16398428	2015-05-04	2015-05-08	4	0	0	84.9	segundo grau	gastroenterológico	2	1	0	0	0	0	1	0	0	0	0	14.2	9	3	0	0	0	1	0	0	1	1	1	1	1	1	1	1	2	0	0	0	0	0	0	0	5	0
402	408648	2	16495135	2015-05-13	2015-05-23	10	0	0	64.9	segundo grau	infeccioso	3	0	0	0	0	0	0	0	0	0	0	12.3	7	5	0	1	1	1	2	2	2	2	2	2	2	2	2	2		0	0	0	5	0	5	5	5	0
403	475249	1	16644131	2015-05-29	2015-06-05	7	0	1	92.3	segundo grau	cardiovascular	3	0	0	0	0	1	0	0	0	0	0	11	18	1	1	1	1	1	2	2	2	2	2	2	2	2	2	2		0	10	10	5	5	5	5	5	5
404	301893	1	16626377	2015-05-27	2015-06-03	7	0	0	79.8	segundo grau	gastroenterológico	2	0	0	0	0	0	1	0	0	0	0	13.6	5	0	0	1	1	1	0	1	1	1	1	1	1	1	1	0	2	5	5	10	10	10	15	15	10	10
405	873599	2	16617198	2015-05-26	2015-05-29	3	0	0	73.4	superior	infeccioso	3	0	0	0	0	0	0	0	1	0	0	12.6	9	0	0	0	0	1	1	1	1	1	1	1	1	1	1	1	0	5	10	10	10	10	15	15	10	10
406	1664637	2	16616041	2015-05-26	2015-06-01	6	0	0	71.1	primeiro grau	infeccioso	2	0	0	0	0	0	0	0	1	0	0	9.2	6	1	0	1	4	1	0	0	1	0	1	1	1	1	0	0	5	5	10	5	10	10	15	15	10	10
407	525539	2	16499585	2015-05-14	2015-05-15	1	0	0	69.2	segundo grau	transplante	3	0	0	0	0	0	1	0	0	0	0	15.6	10	0	0	0	0	1	0	1	1	0	1	1	1	1	1	1	2	5	10	10	10	10	15	15	10	10
408	956821	2	16505179	2015-05-14	2015-05-17	3	0	0	82.6	segundo grau	ortopédico	5	0	0	0	0	0	0	0	0	0	0	9.8	10	0	0	0	0	0	1	1	1	1	1	1	1	1	1	1	0	5	10	10	10	10	15	10	5	5
409	524470	2	16369002	2015-05-14	2015-05-17	3	0	0	63.4	superior	urológico	2	0	0	0	0	0	0	0	0	0	0	10.9	1	1	0	1	1	0	1	1	1	1	1	1	1	1	1	1	0	5	10	0	10	10	15	15	10	10
410	353225	1	16505990	2015-05-14	2015-05-17	3	0	0	85.5	superior	infeccioso	4	0	0	0	0	0	1	1	0	0	0	11.5	14	2	1	1	1	0	2	2	2	2	2	2	2	2	2	2		0	0	0	0	0	0	0	0	0
411	526520	2	16415878	2015-05-05	2015-05-12	7	0	0	69.1	superior	oncológico	4	0	0	1	0	0	0	0	0	0	0	11.8	4	0	0	0	0	1	0	1	1	1	1	1	1	1	1	1	1	5	10	5	10	10	15	15	10	10
412	412957	2	16400435	2015-05-05	2015-05-07	2	0	0	83.3	superior	urológico	1	0	0	0	0	0	0	0	0	0	0	9.9	1	1	0	0	0	0	0	1	1	1	1	1	1	1	1	1	1	5	10	10	10	10	15	15	10	10
413	325716	1	16272175	2015-05-05	2015-05-08	3	0	0	75.2	segundo grau	oncológico	2	0	0	1	0	0	0	0	0	0	0	12.7	1	0	0	0	0	0	0	1	1	1	1	1	1	1	1	1	1	5	10	5	10	10	15	15	10	10
414	443406	2	16405730	2015-05-04	2015-05-15	11	0	0	77.4	Superior	gastroenterológico	3	0	0	0	1	0	1	0	0	0	0	13.7	6	1	1	0	0	1	2	2	2	2	2	2	2	2	2	2		0	0	0	5	0	0	0	0	0
415	530552	1	16452634	2015-05-12	2015-05-13	1	0	0	71	segundo grau	gastroenterológico	1	0	0	0	0	0	0	0	0	0	0	14.4	5	0	0	0	0	1	1	1	1	1	1	1	1	1	1	1	0	5	10	5	10	10	15	15	10	10
416	420602	1	16738882	2015-06-09	2015-06-11	2	0	0	90.2	Superior	infeccioso	3	0	0	0	0	0	0	1	0	0	0	12.3	8	4	0	1	1	1	2	2	2	2	2	2	2	2	2	2		0	0	0	0	0	0	0	0	0
417	423055	1	16697386	2015-06-05	2015-06-11	6	0	0	95.4	segundo grau	infeccioso	3	0	0	1	0	0	0	0	0	0	0	11.9	9	2	1	0	0	1	2	2	2	2	2	2	2	2	2	2		0	5	5	0	0	5	5	0	0
418	1816633	2	16674780	2015-06-06	2015-06-09	3	0	0	67.5	primeiro grau	oncológico	2	0	0	1	0	0	0	0	0	0	0	9.4	4	0	0	0	0	0	0	1	1	1	1	1	1	1	1	1	1	5	10	5	10	10	15	15	10	10
419	1814988	2	16634329	2015-05-29	2015-06-08	10	0	0	62.1	Superior	oncológico	2	0	0	1	0	0	0	0	0	0	0	12.4	2	0	0	0	0	0	1	1	1	1	1	1	1	1	1	1	0	5	10	5	10	10	15	15	10	10
420	972153	2	16656372	2015-05-31	2015-06-08	8	0	0	65.8	superior	pulmonar	4	0	1	0	0	0	1	0	0	0	0	15.9	6	0	0	0	0	0	1	1	1	1	1	1	1	1	1	1	0	5	10	10	10	10	15	15	10	10
421	495928	2	16427113	2015-05-30	2015-06-02	3	0	0	63.4	Superior	oncológico	3	0	0	1	0	0	1	0	0	0	0	11.2	6	0	0	1	1	1	1	1	1	1	1	1	1	1	1	1	0	5	10	5	10	10	15	15	10	10
422	1102969	2	16565883	2015-05-29	2015-06-02	4	0	0	83.1	segundo grau	oncológico	3	0	0	1	0	0	1	0	0	0	0	15.1	7	1	0	0	0	1	1	1	1	1	1	1	1	1	1	1	0	5	10	10	10	10	15	15	10	10
423	1081471	1	16654566	2015-05-30	2015-06-05	6	0	0	85	Superior	infeccioso	3	0	0	0	0	0	0	0	0	0	0	11.6	8	0	0	1	1	1	0	1	1	1	1	1	1	1	1	1	1	5	10	5	10	10	15	15	10	10
424	1338109	2	16645944	2015-05-29	2015-06-04	6	0	0	62.8	superior	infeccioso	4	0	0	0	0	0	1	0	0	0	0	13.5	9	0	0	0	0	1	1	1	1	1	1	1	1	1	1	1	0	5	10	10	10	10	15	15	10	10
425	920478	2	16649314	2015-05-29	2015-06-13	15	1	1	91	Superior	gastroenterológico	4	0	0	0	0	0	0	0	0	0	0	11.6	5	0	1	0	0	1	2	2	2	2	2	2	2	2	2	2		0	0	0	0	0	0	0	0	0
426	595267	2	16658061	2015-05-31	2015-06-14	14	0	1	89.2	Superior	infeccioso	4	0	1	0	0	0	0	0	0	0	0	12.6	8	0	0	1	1	0	0	0	1	1	1	1	1	1	0	0	4	5	5	5	10	5	5	10	5	5
427	1803466	2	16446633	2015-05-08	2015-05-13	5	0	0	73.4	Superior	oncológico	4	0	0	1	0	0	0	0	0	0	0	7.3	3	0	0	0	0	0	1	1	1	1	1	1	1	1	0	1	1	5	10	10	10	10	15	15	10	10
428	341207	2	16442470	2015-05-08	2015-05-11	3	0	0	73.7	superior	infeccioso	5	1	0	0	0	0	0	0	0	0	0	11.3	10	3	0	0	0	0	0	1	1	1	1	1	1	1	1	1		5	10	5	10	10	15	15	10	10
429	598346	1	16459734	2015-05-10	2015-05-14	4	0	0	67.3	superior	neurológico	2	0	0	0	0	0	0	0	0	0	0	16.2	1	0	0	0	0	1	0	1	1	1	1	1	1	1	1	1	1	5	10	5	10	10	15	15	10	10
430	1674820	2	16429588	2015-05-06	2015-05-09	3	0	0	65.3	superior	gastroenterológico	3	0	0	1	0	0	0	0	1	0	0	10.7	10	3	1	1	1	0	0	1	1	1	1	1	1	1	1	1	1	5	5	5	10	10	15	15	10	10
431	351057	1	16405248	2015-05-04	2015-05-14	10	0	0	82	segundo grau	infeccioso	5	0	0	0	0	0	1	0	0	0	0	13.9	15	5	1	0	0	0	2	2	2	2	2	2	2	2	2	2		0	0	0	0	0	0	0	0	0
432	955463	2	16416415	2015-05-05	2015-05-06	1	0	0	73	superior	gastroenterológico	2	0	0	0	0	0	0	0	0	0	0	14.6	5	0	0	0	0	0	1	1	1	1	1	1	1	1	1	1		5	10	10	10	10	15	15	10	10
433	758367	1	16718227	2015-06-08	2015-06-20	12	0	0	81.9	segundo grau	infeccioso	6	1	0	0	0	0	0	0	0	0	0	10.1	5	5	0	0	0	1	1	1	1	1	1	1	1	1	1	1	0	5	10	0	5	5	10	5	5	0
434	708397	2	16697388	2015-06-09	2015-06-12	3	0	0	64.7	superior	oncológico	3	0	0	1	0	0	0	0	0	0	0	14.7	3	0	0	0	0	0	1	1	1	1	1	1	1	1	1	1	0	5	10	10	10	10	15	15	10	10
435	942105	2	16449531	2015-06-08	2015-06-13	5	0	0	65.1	superior	oncológico	3	0	0	1	0	0	0	0	0	0	0	13.8	2	0	0	0	0	1	1	1	1	1	1	1	1	1	1	1	0	5	10	10	10	10	15	15	10	10
436	1813673	2	16685868	2015-06-08	2015-06-11	3	0	0	72.1	superior	urológico	3	0	0	0	0	0	1	0	0	0	0	13.7	5	1	0	1	1	0	1	1	1	1	1	1	1	1	1	1	0	5	10	10	10	10	15	15	10	10
437	533213	2	16845522	2015-06-21	2015-06-26	5	0	0	73.3	superior	renal	5	0	0	0	1	0	1	0	0	0	0	12.3	10	0	0	1	1	1	1	1	1	1	1	1	1	1	1	1	0	5	10	5	10	10	15	15	10	10
438	421850	2	16820856	2015-06-20	2015-06-23	3	0	0	72.4	segundo grau	oncológico	4	0	0	1	1	0	1	0	0	0	0	13.9	12	0	0	1	1	1	1	1	1	1	1	1	1	1	1	1	0	5	10	5	10	10	15	15	10	10
439	1821238	2	16825177	2015-06-20	2015-06-22	2	0	0	75.2	superior	oncológico	1	0	0	1	0	0	0	0	0	0	0	13.5	1	0	0	0	0	0	1	1	1	1	1	1	1	1	1	1	0	5	10	5	10	10	15	15	10	10
440	618587	2	16796242	2015-06-17	2015-07-10	23	1	0	74.8	superior	oncológico	4	1	0	1	0	0	1	0	0	0	0	13.5	10	1	1	1	1	1	0	0	1	0	1	1	1	1	0	0	5	0	10	10	5	5	5	5	5	5
441	540406	2	16810573	2015-06-17	2015-06-19	2	0	0	91.2	superior	infeccioso	2	0	0	0	0	0	0	0	0	0	0	13.4	4	1	0	0	0	0	1	1	1	1	1	1	1	1	1	1	0	5	10	10	10	10	15	15	10	5
442	900871	2	16766122	2015-06-17	2015-06-23	6	0	0	68.1	superior	urológico	4	0	0	0	0	0	0	0	0	0	0	11.8	3	0	0	0	0	0	1	1	1	1	1	1	1	1	1	1		5	10	0	10	10	15	15	10	10
443	1095041	2	16776107	2015-06-17	2015-06-21	4	0	0	79	superior	oncológico	3	0	0	1	0	0	1	0	0	0	0	11.7	7	1	0	0	0	1	1	0	1	0	1	1	1	1	1	1	2	5	10	0	10	10	15	15	10	5
444	888902	2	16750186	2015-06-15	2015-06-18	3	0	0	77.9	superior	oncológico	2	0	0	1	0	0	1	0	0	0	0	9.5	3	0	0	0	0	1	1	1	1	1	1	1	1	1	1	1	0	5	10	10	10	10	15	15	10	10
445	429005	2	16759787	2015-06-16	2015-06-18	2	0	0	74	superior	oncológico	2	0	0	1	0	0	0	0	0	0	0	14.2	1	0	0	0	0	0	1	1	1	1	1	1	1	1	1	1		5	10	10	10	10	15	15	10	10
446	717425	2	16769532	2015-06-15	2015-06-20	5	0	0	79	segundo grau	urológico	3	0	0	0	0	0	1	0	0	0	0	14.3	3	0	0	0	0	1	1	1	1	1	1	1	1	1	1	1	0	5	10	10	10	10	15	15	10	10
447	1820496	2	16802094	2015-06-16	2015-06-30	14	0	0	60.1	primeiro grau	oncológico	2	0	0	0	0	0	1	0	0	0	0	15.8	2	0	0	0	0	1	0	1	1	1	1	1	1	1	1	1	1	5	10	5	10	10	15	15	10	5
448	1468455	1	16761457	2015-06-16	2015-06-18	2	0	0	61.7	superior	ginecológico	2	0	0	0	0	0	0	0	0	0	0	13.2	2	0	0	0	0	0	1	1	1	1	1	1	1	1	1	1	0	5	10	10	10	10	15	15	10	10
449	1290849	1	16788796	2015-06-15	2015-06-19	4	0	0	84.5	segundo grau	infeccioso	3	0	0	0	0	0	0	1	0	0	0	12.7	11	1	1	0	0	0	2	2	2	2	2	2	2	2	2	2		0	0	0	0	0	0	0	0	0
450	1811902	2	16528261	2015-05-18	2015-05-21	3	0	0	68.3	superior	nefrológico	3	1	0	0	1	1	0	0	0	0	0	7.2	3	2	0	0	0	1	1	1	1	1	1	1	1	1	1	1	0	5	10	10	10	10	15	15	10	10
451	453560	2	16537721	2015-05-18	2015-05-22	4	0	0	70.2	superior	pulmonar	4	0	0	0	0	0	1	0	0	0	0	12.5	20	0	0	1	1	1	0	1	1	1	1	1	1	1	1	1	1	5	10	10	10	10	15	15	10	10
452	904600	1	16521067	2015-05-16	2015-05-20	4	0	0	70.7	superior	infeccioso	3	0	0	0	0	0	0	0	0	0	0	10.7	1	0	0	0	0	0	1	1	1	1	1	1	1	1	1	1	0	5	10	10	10	10	15	15	10	10
453	535943	2	16536508	2015-05-18	2015-05-24	6	0	1	90.8	primeiro grau	infeccioso	2	0	0	0	0	0	1	0	0	0	0	11	20	1	0	1	3	1	0	1	1	1	0	0	1	0	0	1	5	5	10	5	10	10	15	10	10	10
454	790895	1	16532953	2015-05-18	2015-07-30	73	1	1	75.5	superior	cardiovascular	2	0	0	1	0	1	0	0	0	0	0	9.5	8	0	0	0	0	1	0	1	1	1	0	0	1	1	1	1	3	0	10	10	10	5	5	10	5	5
455	1801529	2	16410441	2015-05-05	2015-05-09	4	0	0	79	superior	infeccioso	4	0	0	0	1	1	1	0	0	0	0	9.6	9	2	0	1	3	1	1	1	1	1	1	1	1	1	1	1	0	5	10	10	10	10	15	15	10	10
456	881943	2	16347214	2015-05-06	2015-05-08	2	0	0	85.1	superior	urológico	3	0	0	0	0	0	1	0	0	0	0	11.7	19	0	0	0	0	0	1	1	1	1	1	1	1	1	1	1	0	5	5	5	10	5	10	15	10	5
457	1226541	1	16364862	2015-05-05	2015-05-14	9	0	0	65.9	superior	oncológico	2	0	0	1	0	0	0	0	0	0	0	9.3	2	1	0	0	0	1	0	0	1	1	1	1	1	1	1	0	3	5	10	10	10	10	15	15	10	10
458	517731	1	16492961	2015-05-13	2015-05-16	3	0	0	80.6	segundo grau	gastroenterológico	1	0	0	0	0	0	0	0	0	0	0	13.5	2	1	0	1	1	0	2	2	2	2	2	2	2	2	2	2		5	10	10	10	10	15	15	10	10
459	473065	1	16477538	2015-05-12	2015-05-16	4	0	0	62.8	superior	infeccioso	4	0	0	0	0	0	0	0	0	0	0	16.1	3	0	0	0	0	1	1	1	1	1	1	1	1	1	1	1	0	5	10	5	10	10	15	15	10	10
460	1103676	1	16525127	2015-05-17	2015-05-20	3	0	0	67.4	primeiro garu	gastroenterológico	2	0	0	0	0	0	1	0	0	0	0	11.6	17	0	0	0	0	0	1	1	1	1	1	1	1	1	1	1	0	5	10	10	10	10	15	15	10	10
461	454180	1	16856098	2015-06-22	2015-06-24	2	0	0	89	primeiro grau	gastroenterológico	4	0	1	0	0	0	0	0	0	0	0	11.8	14	3	0	1	1	1	1	1	1	1	1	1	1	1	1	1	0	0	5	5	5	5	10	10	5	5
462	940830	1	16531871	2015-05-18	2015-06-15	28	1	0	89.6	primeiro grau	infeccioso	1	0	0	0	0	0	0	0	0	0	0	8.4	5	0	1	1	2	0	2	2	2	2	2	2	2	2	2	2		0	10	0	5	0	0	0	0	0
463	309107	1	16531363	2015-05-18	2015-06-23	36	1	0	93.8	segundo grau	neurológico	2	1	0	0	0	0	0	0	0	0	0	13.7	12	0	0	1	1	1	1	1	1	1	1	1	1	1	1	1	0	0	10	5	5	5	5	0	0	0
464	1811747	2	16521925	2015-05-16	2015-05-20	4	0	0	80.8	primeiro grau	neurológico	1	0	0	0	0	0	0	0	0	0	0	12.1	4	0	0	1	1	1	1	1	1	1	1	1	1	1	1	1	0	5	10	10	10	10	15	15	10	10
465	1791168	2	16396165	2015-05-10	2015-05-13	3	0	0	77.1	Superior	oncológico	1	0	0	1	0	0	0	0	0	0	0	14.3	1	0	0	0	0	0	1	1	1	1	1	1	1	1	1	1	5	5	10	10	10	10	15	15	10	10
466	930671	1	16454244	2015-05-09	2015-05-17	8	0	0	68	segundo grau	infeccioso	4	0	0	0	0	0	0	0	0	0	0	9.9	14	1	0	0	0	0	1	1	1	1	1	1	1	1	1	1	0	5	10	0	10	10	10	15	10	10
467	1463242	1	16445989	2015-05-08	2015-05-13	5	0	0	65.3	primeiro grau	infeccioso	3	0	0	0	0	0	0	0	0	0	0	12.3	8	2	0	0	0	1	1	1	1	1	1	1	1	1	1	0	1	5	10	5	5	10	15	15	10	10
468	1809624	1	16457256	2015-05-09	2015-05-15	6	0	0	83.7	segundo grau	infeccioso	3	0	0	0	0	0	0	0	0	0	0	12.8	2	2	0	0	0	0	1	1	1	1	1	1	1	1	1	1	0	5	0	0	10	10	15	15	10	10
469	1809171	2	16437026	2015-05-09	2015-05-12	3	0	0	63.7	Superior	urológico	2	0	0	0	0	0	0	0	1	0	0	13	2	0	0	0	1	0	1	1	1	1	1	1	1	1	1	1	0	5	10	5	10	10	15	15	10	10
470	1801444	2	16412313	2015-05-08	2015-05-12	4	0	0	64.1	superior	oncológico	1	0	0	1	0	0	0	0	0	0	0	14.3	4	0	0	0	0	0	1	1	1	1	1	1	1	1	1	1	0	5	10	10	10	10	15	15	10	10
471	337610	1	16467850	2015-05-11	2015-05-14	3	0	0	62.4	segundo grau	infeccioso	2	0	0	0	0	0	0	0	0	0	0	13.6	3	0	0	0	0	0	1	1	1	1	1	1	1	1	1	1	0	5	10	10	10	10	15	15	10	10
472	1094400	1	16471219	2015-05-11	2015-05-21	10	0	0	82.8	Superior	infeccioso	4	0	0	0	0	0	1	0	0	0	0	12.9	12	2	0	1	2	0	1	1	1	1	1	1	1	1	1	1	0	5	10	5	10	10	15	15	5	10
473	349971	1	16469959	2015-05-11	2015-05-14	3	0	0	88.2	segundo grau	neurológico	1	0	0	0	0	0	1	0	0	0	0	10.3	12	0	0	1	4	0	0	0	1	1	1	1	1	1	1	1	2	5	10	10	10	10	15	15	10	10
474	786877	1	16854169	2015-06-22	2015-06-25	3	0	0	90	superior	metabólico	4	0	0	0	0	0	0	0	0	0	0	13.9	4	0	0	0	0	1	0	1	1	1	1	1	1	1	1	1	5	5	5	10	10	10	15	15	10	5
475	330751	2	16828020	2015-06-23	2015-06-27	4	0	0	68.9	Superior	oncológico	3	0	0	1	0	0	0	0	0	0	0	15	2	2	0	0	0	1	1	1	1	1	1	1	1	1	1	1	0	5	10	0	10	10	15	15	10	10
476	535311	1	16611355	2015-05-26	2015-06-01	6	0	0	73.9	segundo grau	gastroenterológico	3	0	0	0	0	0	0	0	0	0	0	14.1	4	0	1	0	0	1	1	1	1	1	1	1	0	0	1	1	2	5	5	5	10	10	15	15	10	10
477	333519	1	16788887	2015-06-15	2015-06-18	3	0	0	83.4	Superior	infeccioso	2	0	0	0	1	0	0	0	0	0	0	13.7	4	2	0	0	0	1	1	1	1	1	1	1	1	1	1	1	0	5	10	10	10	10	15	15	10	10
478	1004326	1	16782294	2015-06-14	2015-06-20	6	0	0	69.8	superior	infeccioso	2	0	0	0	0	0	0	0	0	0	0	12.5	0	1	0	0	0	0	1	1	1	1	1	1	1	1	1	1	0	5	10	10	10	10	15	15	10	10
479	1388034	2	16780737	2015-06-14	2015-06-18	4	0	0	90.1	primeiro grau	infeccioso	5	0	0	0	0	0	0	0	0	0	0	12.1	5	0	0	1	1	0	1	1	1	1	1	1	1	1	1	1	0	5	10	10	10	10	15	15	10	10
480	474668	1	16794477	2015-06-15	2015-06-24	9	0	0	92.1	segundo grau	ortopédico	2	0	0	0	0	0	1	0	0	0	0	11.8	11	0	0	1	1	1	0	0	1	0	1	0	1	0	1	0	6	5	5	5	10	10	15	15	10	10
481	1468133	2	16469436	2015-06-09	2015-06-11	2	0	0	68	superior	oncológico	1	0	0	1	0	0	0	0	0	0	0	13.2	2	0	0	1	1	0	1	1	1	1	1	1	1	1	1	1	0	5	10	10	10	10	15	15	10	10
482	1809987	2	16482159	2015-05-12	2015-05-14	2	0	0	63.5	superior	ortopédico	4	0	0	0	0	0	1	0	0	0	0	13.9	6	0	0	0	0	1	1	1	1	1	1	1	1	1	1	1	0	5	10	10	10	10	15	15	10	10
483	337562	2	16636541	2015-05-28	2015-06-01	4	0	0	71.3	superior	infeccioso	2	0	0	0	0	0	0	0	0	0	0	8.9	6	5	0	0	0	1	1	1	1	1	1	1	1	1	1	1	0	5	10	10	10	10	15	15	10	10
484	1808734	2	16604546	2015-05-27	2015-05-29	2	0	0	60.4	superior	urológico	3	0	0	0	0	0	0	0	1	0	0	12.4	2	2	0	0	0	0	1	1	1	1	1	1	1	1	1	1	0	5	10	10	10	10	15	15	10	10
485	846203	1	16616929	2015-05-26	2015-05-29	3	0	0	93.4	segundo grau	neurológico	3	0	0	0	0	0	0	0	0	0	0	12.9	5	0	0	0	0	1	1	1	1	1	1	1	1	0	1	1	1	5	5	5	10	10	15	15	10	10
486	1814441	1	16606496	2015-05-26	2015-05-28	2	0	0	84.8	superior	oncológico	2	0	0	1	0	0	0	0	0	0	0	13.5	7	0	0	1	1	0	0	1	1	1	1	1	1	1	1	1	1	5	10	5	10	10	15	15	10	10
487	323604	1	16860742	2015-06-23	2015-06-25	2	0	0	64.3	segundo grau	gastroenterológico	4	0	0	0	0	0	1	0	0	0	0	13.5	5	0	0	1	1	1	1	1	1	1	1	1	1	1	1	1	0	5	10	5	10	10	15	15	10	10
488	328889	1	16861051	2015-06-23	2015-06-24	1	0	0	87.6	segundo grau	gastroenterológico	2	0	0	0	0	0	0	0	0	0	0	14.2	7	0	0	0	0	1	1	1	1	1	1	1	1	1	1	1	0	5	10	0	10	5	10	10	5	5
489	601323	1	16866285	2015-06-23	2015-08-09	47	1	0	80.7	superior	ortopédico	3	0	0	0	0	0	0	0	0	0	0	11.9	10	0	0	0	0	1	1	1	1	1	1	1	1	1	1	1	0	5	5	5	10	5	10	10	5	5
490	1419283	1	16859477	2015-06-23	2015-06-29	6	0	0	80.2	segundo grau	ortopédico	2	0	0	0	0	0	0	0	0	0	0	13.6	8	0	0	1	1	1	1	1	1	1	1	1	1	1	1	1	0	5	10	5	10	10	15	15	10	0
491	1263466	2	16854424	2015-06-22	2015-06-26	4	0	0	84.8	segundo grau	infeccioso	2	0	0	0	0	0	0	1	0	0	0	13.9	8	3	1	1	3	1	2	2	2	2	2	2	2	2	2	2		0	10	5	5	5	10	10	5	5
492	1620351	1	16866591	2015-06-23	2015-06-28	5	0	0	63.3	segundo grau	gastroenterológico	3	0	0	0	0	0	0	0	0	0	0	12.8	3	0	0	0	0	1	1	1	1	1	1	1	1	1	1	1	0	5	10	5	10	10	15	15	10	10
493	386131	1	16397527	2015-05-04	2015-05-05	1	0	0	64.7	superior	gastroenterológico	2	0	0	0	0	0	0	0	0	0	0	13.8	3	1	0	0	0	0	1	1	1	1	1	1	1	1	1	1	0	5	10	10	10	10	15	15	10	10
494	744176	2	16330088	2015-05-04	2015-05-06	2	0	0	60.7	superior	urológico	2	0	0	0	0	0	0	0	0	0	0	14.2	4	0	0	0	0	0	0	1	1	1	1	1	1	1	1	1	1	5	10	10	10	10	15	15	10	10
495	361194	2	16300768	2015-05-03	2015-05-08	5	0	0	62.7	superior	oncológico	3	0	0	0	0	0	0	0	0	0	0	14.8	12	1	0	0	0	0	1	1	1	0	1	1	1	1	1	1	1	5	10	10	10	10	15	15	10	10
496	1802276	2	16216418	2015-04-28	2015-05-01	3	0	0	63.4	superior	oncológico	1	0	0	1	0	0	0	0	0	0	0	12	0	0	0	0	0	0	1	1	1	1	1	1	1	1	1	1	0	5	10	10	10	10	15	15	10	10
497	445761	2	16357062	2015-04-28	2015-05-05	7	0	0	91.6	superior	infeccioso	3	0	0	1	0	0	0	0	0	0	0	13.5	4	0	0	0	0	0	0	1	1	1	1	1	1	1	0	1	2	5	10	0	10	10	15	15	10	10
498	1086092	1	16579848	2015-05-22	2015-05-26	4	0	0	62.2	superior	gastroenterológico	3	0	0	0	0	0	0	0	0	0	0	14.3	5	1	0	0	0	0	1	1	1	1	1	1	1	1	1	1	0	5	10	5	10	10	15	15	10	10
499	581157	1	16592556	2015-05-24	2015-05-28	4	0	1	84.2	superior	gastroenterológico	2	0	0	1	0	0	0	0	0	0	0	12	2	0	0	0	0	0	0	1	1	1	1	1	1	0	1	1	2	5	10	10	10	10	15	15	10	10
500	837065	1	16593503	2015-05-24	2015-05-26	2	0	0	66.7	superior	gastroenterológico	2	0	0	0	0	0	0	0	0	0	0	13.9	2	1	0	0	0	0	1	1	1	1	1	1	1	1	1	0	1	5	10	5	10	10	15	15	10	10
501	1811937	2	16529175	2015-05-20	2015-05-22	2	0	0	78.4	superior	gastroenterológico	1	0	0	0	0	0	0	0	0	0	0	15.3	3	0	1	0	0	0	1	1	1	1	1	1	1	1	1	1	0	5	10	10	10	10	15	15	10	10
502	1268219	2	16829833	2015-06-24	2015-06-26	2	0	0	69.9	superior	gastroenterológico	1	0	0	0	0	0	0	0	0	0	0	14.6	4	2	0	0	0	0	1	1	1	1	1	1	1	1	1	1	0	5	10	10	10	10	15	15	10	10
503	4325825	2	16874677	2015-06-24	2015-06-26	2	0	1	87	superior	oncológico	1	0	0	1	0	0	0	0	0	0	0	8.2	10	6	1	0	0	1	2	2	2	2	2	2	2	2	2	2		0	0	0	0	0	0	0	0	0
504	579558	1	16875294	2015-06-24	2015-07-04	10	0	0	60.1	superior	neurológico	1	0	0	0	0	0	0	0	0	0	0	13.5	7	1	1	0	0	1	2	2	2	2	2	2	2	2	2	2		0	0	0	0	0	0	0	0	0
505	367430	2	16875970	2015-06-24	2015-07-01	7	0	0	89.1	superior	neurológico	3	0	1	1	0	0	0	0	0	0	0	10.1	7	5	1	0	0	1	2	2	2	2	2	2	2	2	2	2		0	0	0	0	0	0	0	0	0
506	1031797	2	16761944	2015-06-24	2015-06-26	2	0	0	80.5	superior	oncológico	3	0	0	1	0	0	0	0	0	0	0	14	8	1	0	0	0	1	1	1	1	1	1	1	1	1	1	1	0	5	10	5	10	5	10	10	5	5
507	881914	2	16870512	2015-06-24	2015-06-26	2	0	0	66.1	superior	urológico	3	0	0	0	0	0	0	0	0	0	0	14.7	6	0	0	0	0	0	1	1	1	1	1	1	1	1	1	1	0	5	10	5	10	10	15	15	10	10
508	1533838	1	16833610	2015-06-24	2015-06-26	2	0	0	84.4	primeiro grau	gastroenterológico	2	0	0	0	0	0	0	0	0	0	0	11	3	0	0	0	1	0	1	1	1	1	1	1	1	1	1	0	1	5	10	5	10	10	15	15	10	10
509	1420523	2	16534161	2015-05-19	2015-05-23	4	0	0	73.4	segundo grau	urológico	3	0	0	0	0	0	1	0	0	0	0	15.3	7	0	0	0	0	0	1	1	1	1	1	1	1	1	1	1	0	5	10	10	10	10	15	15	10	10
510	465756	2	16585679	2015-05-22	2015-05-29	7	0	0	61.1	Superior	infeccioso	2	0	0	1	0	0	0	0	0	0	0	11.6	6	1	0	0	0	0	1	1	1	1	1	1	1	1	1	1	0	5	10	10	10	10	15	15	10	10
511	1215114	2	16579153	2015-05-24	2015-05-26	2	0	0	64.3	Superior	oncológico	1	0	0	1	0	0	0	0	0	0	0	10.5	0	0	0	0	0	0	1	1	1	1	1	1	1	1	1	1	0	5	10	5	10	10	10	10	10	10
512	1813686	2	16580772	2015-05-23	2015-05-26	3	0	0	62	Superior	oncológico	2	0	0	1	0	0	0	0	0	0	0	12.7	2	0	0	1	1	0	1	1	1	1	1	1	1	1	1	1	0	5	10	5	10	10	15	15	10	10
513	518028	2	16589798	2015-05-24	2015-05-26	2	0	0	65.8	Superior	infeccioso	3	0	0	0	0	0	0	0	0	0	0	13	2	0	0	0	0	1	0	1	1	1	1	1	1	1	1	1	1	5	10	10	10	10	15	15	10	10
514	722830	1	16525125	2015-05-17	2015-05-24	7	0	0	79.4	Superior	cardiovascular	2	0	0	0	0	0	0	0	0	0	0	13.8	15	0	0	1	1	1	0	0	1	1	1	1	1	1	1	0	3	0	10	10	5	10	15	15	5	5
515	524393	2	16578837	2015-05-26	2015-05-29	3	0	0	80.4	Superior	oncológico	4	1	0	1	0	0	0	0	0	0	0	9.2	5	1	0	0	0	0	1	1	1	1	1	1	1	1	1	1	0	5	10	10	10	10	15	15	10	10
516	1814460	2	16607661	2015-05-26	2015-05-29	3	0	0	64.7	Superior	urológico	2	0	0	0	0	0	0	0	0	0	0	11.4	1	0	0	1	1	0	1	1	1	1	1	1	1	1	1	1	0	5	10	10	10	10	15	15	10	10
517	1814741	1	16615445	2015-05-26	2015-05-30	4	0	0	74.5	Superior	endocrinológico	2	0	0	0	0	0	1	0	0	0	0	11.2	7	0	0	1	2	1	1	1	1	1	1	1	1	1	1	1	0	5	10	10	10	10	15	15	10	10
518	309893	2	16587860	2015-05-25	2015-05-27	2	0	0	68.6	Superior	cardiovascular	4	0	0	1	0	1	1	0	0	0	0	15.7	15	0	0	0	0	1	1	0	1	1	1	1	1	1	1	1	1	5	10	10	10	10	15	15	10	10
519	339982	2	16582541	2015-05-25	2015-05-27	2	0	0	72	Superior	oncológico	2	0	0	0	0	0	0	0	0	0	0	13.5	5	0	0	0	0	0	1	1	1	1	1	1	1	1	1	1	0	5	10	10	10	10	15	15	10	10
520	1822760	2	16882749	2015-06-25	2015-06-29	4	0	0	64.5	Superior	urológico	2	0	0	0	0	0	0	0	0	0	0	11.6	2	0	0	1	1	0	0	1	1	1	1	1	1	1	1	1	1	5	10	10	10	10	15	15	10	10
521	1225114	1	16886139	2015-06-25	2015-07-02	7	0	0	84.2	Primeiro grau	infeccioso	6	0	0	0	0	0	0	1	0	0	0	17.3	11	1	1	0	0	1	2	2	2	2	2	2	2	2	2	2		0	0	0	0	0	0	0	0	0
522	1356066	2	16834598	2015-06-25	2015-07-01	6	0	0	66.4	Superior	oncológico	2	0	0	1	0	0	0	0	0	0	0	14.5	2	1	0	0	0	1	1	1	1	1	1	1	1	1	1	1	0	5	10	10	10	10	15	15	10	10
523	1634178	2	16853605	2015-06-25	2015-06-27	2	0	0	75.5	Superior	oncológico	2	0	0	1	0	0	0	0	0	0	0	12.3	5	0	0	0	0	1	1	1	1	1	1	1	1	1	1	1	0	5	10	5	10	10	15	15	10	10
[truncated: 16 more columns]

## Sheet: Legend
Sex	1	Female
	2	Male
Barthel	1	Total dependency
	2	Severe dependency
	3	Moderate dependency
	4	Light dependency
	5	Independency
Cogn_cat	1	Normal mental functioning
	2	Light cognitive impairment
	3	Moderate cognitive impairment
	4	Severe cognitive impairment
	5	Unable to answer

## Sheet: Results
	Permanência (> 15 dias)											Variables in the Equation																									Variables in the Equation
Variável	Breve		Longa		Total	OR	IC (95%)		p	p				B	S.E.	Wald	df	Sig.	Exp(B)	95% C.I.for EXP(B)				Permanência (> 15 dias)								OR	IC (95%)		p				B	S.E.	Wald	df	Variável	OR	IC (95%)		p
	n	%	n	%			Inferior	Superior												Lower	Upper		Variável	Permanência	Média	DP	Mediana	Mínimo	Máximo	N	p		Inferior	Superior											Inferior	Superior
Sexo									0.523263	0.524		Step 1a	Sexo(1)	0.234	0.368	0.406	1	0.524	1.264	0.615	2.598		Idade (anos)	Breve	74.838	9.4806	73.8	60.1	109	490	0,005*	1.053	1.015	1.093	0.006		Step 1a	risconutricional(1)	1.048	0.56	3.505	1	Risco nutricional	2.852	0.952	8.546	0.061
Feminino	221	94.4444	13	5.55556	234	1							Constant	-2.833	0.285	98.555	1	0	0.059					Longa	79.667	9.4541	80.6	60.5	94	33								cattransferir(1)	2.473	0.412	36.057	1	Transferência (0/5)	11.862	5.291	26.593	<0,001
Masculino	269	93.0796	20	6.92042	289	1.264	0.615	2.598				a Variable(s) entered on step 1: Sexo.												Total	75.143	9.5425	74.3	60.1	109	523								Constant	-4.587	0.574	63.959	1
Escolaridade									0,533#	0.53													numero de diagnosticos	Breve	3	1.418	3	1	13	490	0.077	1.175	0.943	1.464	0.15		a Variable(s) entered on step 1: risconutricional, cattransferir.
Primeiro grau	57	91.9355	5	8.06452	62	1						Variables in the Equation												Longa	3.36	1.27	3	1	6	33
Segundo grau	132	92.3077	11	7.69231	143	0.95	0.316	2.859						B	S.E.	Wald	df	Sig.	Exp(B)	95% C.I.for EXP(B)				Total	3.02	1.411	3	1	13	523
Superior	301	94.6541	17	5.34591	318	0.644	0.228	1.815												Lower	Upper		hemoglobina	Breve	12.604	1.8391	12.7	6.6	17.3	490	0,012*	0.797	0.666	0.954	0.013
AVC									0,074*	0.07		Step 1a	anosescolaridade			1.27	2	0.53						Longa	11.776	1.7929	12	7.4	16.2	33
Não	458	94.2387	28	5.76132	486	1							anosescolaridade(1)	-0.051	0.562	0.008	1	0.927	0.95	0.316	2.859			Total	12.552	1.8456	12.7	6.6	17.3	523
Sim	32	86.4865	5	13.5135	37	2.556	0.925	7.065					anosescolaridade(2)	-0.44	0.529	0.693	1	0.405	0.644	0.228	1.815		n de medicacoes	Breve	5.95	3.873	5	0	26	490	0.039	1.07	0.985	1.162	0.109
DPOC									0,616*	0.998			Constant	-2.434	0.466	27.224	1	0	0.088					Longa	7.06	3.201	7	2	15	33
Não	473	93.4783	33	6.52174	506	1						a Variable(s) entered on step 1: anosescolaridade.												Total	6.02	3.841	5	0	26	523
Sim	17	100	0	0	17	&																	n de internacoes /6 meses	Breve	0.72	1.154	0	0	7	490	0.074	1.154	0.886	1.504	0.287
Neoplasia									0.786603	0.787		Variables in the Equation												Longa	0.94	1.059	1	0	4	33
Não	376	93.5323	26	6.46766	402	1								B	S.E.	Wald	df	Sig.	Exp(B)	95% C.I.for EXP(B)				Total	0.73	1.148	0	0	7	523
Sim	114	94.2149	7	5.78512	121	0.888	0.376	2.099												Lower	Upper		difBarthel	Breve	9.9796	15.3886	0	-15	90	490	0.073	1.017	0.998	1.037	0.077
IRC dialitica									0,614*	0.999		Step 1a	AVC	0.938	0.519	3.272	1	0.07	2.556	0.925	7.065			Longa	15	17.8973	10	0	55	33
Não	475	93.5039	33	6.49606	508	1							Constant	-2.795	0.195	206.085	1	0	0.061					Total	10.2964	15.5874	0	-15	90	523
Sim	15	100	0	0	15	&						a Variable(s) entered on step 1: AVC.											Teste Mann-Whitney; * Teste t-Student
ICC									0,108*	0.072
Não	448	94.3158	27	5.68421	475	1						Variables in the Equation
Sim	42	87.5	6	12.5	48	2.37	0.926	6.065						B	S.E.	Wald	df	Sig.	Exp(B)	95% C.I.for EXP(B)
DM									0.0321536	0.036										Lower	Upper
Não	353	95.1482	18	4.85175	371	1						Step 1a	DPOC	-18.54	9748.23	0	1	0.998	0	0	.
Sim	137	90.1316	15	9.86842	152	2.147	1.052	4.381					Constant	-2.663	0.18	218.692	1	0	0.07
Demencia									0,005*	0.002		a Variable(s) entered on step 1: DPOC.
Não	461	94.6612	26	5.33881	487	1
Sim	29	80.5556	7	19.4444	36	4.28	1.714	10.686				Variables in the Equation
Hepatopatia									>0,999*	0.806				B	S.E.	Wald	df	Sig.	Exp(B)	95% C.I.for EXP(B)
Não	471	93.6382	32	6.36183	503	1														Lower	Upper
Sim	19	95	1	5	20	0.775	0.1	5.973				Step 1a	Neoplasia	-0.119	0.439	0.073	1	0.787	0.888	0.376	2.099
Ico									0,389*	0.421			Constant	-2.671	0.203	173.557	1	0	0.069
Não	438	93.9914	28	6.00858	466	1						a Variable(s) entered on step 1: Neoplasia.
Sim	52	91.2281	5	8.77193	57	1.504	0.557	4.064
resido sozinho									0.379592	0.384		Variables in the Equation
Não	401	93.2558	29	6.74419	430	1								B	S.E.	Wald	df	Sig.	Exp(B)	95% C.I.for EXP(B)
Sim	89	95.6989	4	4.30108	93	0.621	0.213	1.812												Lower	Upper
delirium									<0,001*	<0,001		Step 1a	IRCdialitica	-18.536	10377.8	0	1	0.999	0	0	.
Não	446	95.2991	22	4.70085	468	1							Constant	-2.667	0.18	219.446	1	0	0.069
Sim	44	80	11	20	55	5.068	2.307	11.136				a Variable(s) entered on step 1: IRCdialitica.
incontinencia									0.00100886	0.002
Não	318	96.3636	12	3.63636	330	1						Variables in the Equation
Sim	172	89.1192	21	10.8808	193	3.235	1.554	6.735						B	S.E.	Wald	df	Sig.	Exp(B)	95% C.I.for EXP(B)
Quedas									0.396741	0.399										Lower	Upper
Não	387	94.1606	24	5.83942	411	1						Step 1a	ICC	0.863	0.479	3.242	1	0.072	2.37	0.926	6.065
Sim	103	91.9643	9	8.03571	112	1.409	0.635	3.124					Constant	-2.809	0.198	200.927	1	0	0.06
Quedas frequentes (> 2 ano)									0,155*	0.998		a Variable(s) entered on step 1: ICC.
Não	455	93.2377	33	6.7623	488	1
Sim	35	100	0	0	35	&		.				Variables in the Equation
risco nutricional									0.00772638	0.013				B	S.E.	Wald	df	Sig.	Exp(B)	95% C.I.for EXP(B)
Não	170	97.7011	4	2.29885	174	1														Lower	Upper
Sim	320	91.6905	29	8.30946	349	3.852	1.332	11.137				Step 1a	DM	0.764	0.364	4.412	1	0.036	2.147	1.052	4.381
perda de peso									>0,999*	0.999			Constant	-2.976	0.242	151.694	1	0	0.051
Não	486	93.6416	33	6.35838	519	1						a Variable(s) entered on step 1: DM.
Sim	4	100	0	0	4	&
reducao alimentar									0,279*	0.239		Variables in the Equation
Não	486	93.8224	32	6.17761	518	1								B	S.E.	Wald	df	Sig.	Exp(B)	95% C.I.for EXP(B)
Sim	4	80	1	20	5	3.797	0.412	34.97												Lower	Upper
dif mastigacao / degluticao									0,001*	<0,001		Step 1a	Demencia	1.454	0.467	9.698	1	0.002	4.28	1.714	10.686
Não	480	94.4882	28	5.51181	508	1							Constant	-2.875	0.202	203.475	1	0	0.056
Sim	10	66.6667	5	33.3333	15	8.571	2.744	26.778				a Variable(s) entered on step 1: Demencia.
rebaixamento consciencia									<0,001*	<0,001
Não	483	94.7059	27	5.29412	510	1						Variables in the Equation
Sim	7	53.8462	6	46.1538	13	15.333	4.82	48.779						B	S.E.	Wald	df	Sig.	Exp(B)	95% C.I.for EXP(B)
jejum + 72 horas									>0,999*	0.999										Lower	Upper
Não	481	93.5798	33	6.42023	514	1						Step 1a	Hepatopatia	-0.255	1.042	0.06	1	0.806	0.775	0.1	5.973
Sim	9	100	0	0	9	&							Constant	-2.689	0.183	216.683	1	0	0.068
diarreia									>0,999*	0.999		a Variable(s) entered on step 1: Hepatopatia.
Não	483	93.6047	33	6.39535	516	1
Sim	7	100	0	0	7	&						Variables in the Equation
DM recem diagnosticado/descomp									0,003*	0.001				B	S.E.	Wald	df	Sig.	Exp(B)	95% C.I.for EXP(B)
Não	478	94.4664	28	5.5336	506	1														Lower	Upper
Sim	12	70.5882	5	29.4118	17	7.113	2.343	21.599				Step 1a	Ico	0.408	0.507	0.648	1	0.421	1.504	0.557	4.064
nausea/vomitos									0,011*	0.005			Constant	-2.75	0.195	199.029	1	0	0.064
Não	489	94.0385	31	5.96154	520	1						a Variable(s) entered on step 1: Ico.
Sim	1	33.3333	2	66.6667	3	31.548	2.784	357.548
Risco ou presença de hipoglicemia									0.026311	0.03		Variables in the Equation
Não	380	95	20	5	400	1								B	S.E.	Wald	df	Sig.	Exp(B)	95% C.I.for EXP(B)
Sim	110	89.4309	13	10.5691	123	2.245	1.082	4.659												Lower	Upper
cirurgia extensa									>0,999*	0.954		Step 1a	residosozinho	-0.476	0.546	0.759	1	0.384	0.621	0.213	1.812
Não	476	93.7008	32	6.29921	508	1							Constant	-2.627	0.192	186.588	1	0	0.072
Sim	14	93.3333	1	6.66667	15	1.062	0.135	8.337				a Variable(s) entered on step 1: residosozinho.
politrauma/sepse/ventilacao									>0,999*	0.999
Não	486	93.6416	33	6.35838	519	1						Variables in the Equation
Sim	4	100	0	0	4	&								B	S.E.	Wald	df	Sig.	Exp(B)	95% C.I.for EXP(B)
ulcera									0,007*	0.003										Lower	Upper
Não	450	94.7368	25	5.26316	475	1						Step 1a	delirium	1.623	0.402	16.327	1	0	5.068	2.307	11.136
Sim	40	83.3333	8	16.6667	48	3.6	1.524	8.502					Constant	-3.009	0.218	189.861	1	0	0.049
alergia alimentar ou dieta epecífica									0.305707	0.308		a Variable(s) entered on step 1: delirium.
Não	253	94.7566	14	5.24345	267	1
Sim	237	92.5781	19	7.42188	256	1.449	0.71	2.955				Variables in the Equation
nutricao entereal/parenteral									0,243*	0.27				B	S.E.	Wald	df	Sig.	Exp(B)	95% C.I.for EXP(B)
Não	477	93.8976	31	6.10236	508	1														Lower	Upper
Sim	13	86.6667	2	13.3333	15	2.367	0.511	10.958				Step 1a	incontinencia	1.174	0.374	9.854	1	0.002	3.235	1.554	6.735
dia /mes / ano									<0,001#	<0,001			Constant	-3.277	0.294	124.19	1	0	0.038
Não	119	93.7008	8	6.29921	127	1.907	0.749	4.856				a Variable(s) entered on step 1: incontinencia.
Sim	312	96.5944	11	3.40557	323	1
Incapaz	59	80.8219	14	19.1781	73	6.73	2.913	15.548				Variables in the Equation
dia da semana									<0,001#	<0,001				B	S.E.	Wald	df	Sig.	Exp(B)	95% C.I.for EXP(B)
Não	42	91.3043	4	8.69565	46	2.47	0.784	7.784												Lower	Upper
Sim	389	96.2871	15	3.71287	404	1						Step 1a	queda1	0.343	0.406	0.712	1	0.399	1.409	0.635	3.124
Incapaz	59	80.8219	14	19.1781	73	6.154	2.826	13.399					Constant	-2.78	0.21	174.697	1	0	0.062
lugar									<0,001#	<0,001		a Variable(s) entered on step 1: queda1.
Não	8	88.8889	1	11.1111	9	2.937	0.348	24.761
Sim	423	95.9184	18	4.08163	441	1						Variables in the Equation
Incapaz	59	80.8219	14	19.1781	73	5.576	2.635	11.801						B	S.E.	Wald	df	Sig.	Exp(B)	95% C.I.for EXP(B)
n de telefone									<0,001#	<0,001										Lower	Upper
Não	26	83.871	5	16.129	31	5.563	1.86	16.636				Step 1a	quedafreq	-18.579	6793.85	0	1	0.998	0	0	.
Sim	405	96.6587	14	3.34129	419	1							Constant	-2.624	0.18	211.818	1	0	0.073
Incapaz	59	80.8219	14	19.1781	73	6.864	3.117	15.118				a Variable(s) entered on step 1: quedafreq.
idade									<0,001#	<0,001
Não	15	88.2353	2	11.7647	17	3.263	0.69	15.42				Variables in the Equation
Sim	416	96.0739	17	3.9261	433	1								B	S.E.	Wald	df	Sig.	Exp(B)	95% C.I.for EXP(B)
Incapaz	59	80.8219	14	19.1781	73	5.807	2.721	12.392												Lower	Upper
data de nascimento									<0,001#	<0,001		Step 1a	risconutricional	1.348	0.542	6.196	1	0.013	3.852	1.332	11.137
Não	9	90	1	10	10	2.605	0.313	21.684					Constant	-3.75	0.506	54.942	1	0	0.024
Sim	422	95.9091	18	4.09091	440	1						a Variable(s) entered on step 1: risconutricional.
Incapaz	59	80.8219	14	19.1781	73	5.563	2.629	11.773
presidente atual									<0,001#	<0,001		Variables in the Equation
Não	15	88.2353	2	11.7647	17	3.263	0.69	15.42						B	S.E.	Wald	df	Sig.	Exp(B)	95% C.I.for EXP(B)
Sim	416	96.0739	17	3.9261	433	1														Lower	Upper
Incapaz	59	80.8219	14	19.1781	73	5.807	2.721	12.392				Step 1a	perdadepeso	-18.513	20096.5	0	1	0.999	0	0	.
presidente anterior									<0,001#	<0,001			Constant	-2.69	0.18	223.558	1	0	0.068
Não	19	90.4762	2	9.52381	21	2.551	0.549	11.848				a Variable(s) entered on step 1: perdadepeso.
Sim	412	96.0373	17	3.9627	429	1
Incapaz	59	80.8219	14	19.1781	73	5.751	2.694	12.274				Variables in the Equation
nome solt da mae									<0,001#	<0,001				B	S.E.	Wald	df	Sig.	Exp(B)	95% C.I.for EXP(B)
Não	23	88.4615	3	11.5385	26	3.326	0.904	12.237												Lower	Upper
Sim	408	96.2264	16	3.77358	424	1						Step 1a	reducaoalimentar	1.334	1.133	1.387	1	0.239	3.797	0.412	34.97
Incapaz	59	80.8219	14	19.1781	73	6.051	2.809	13.035					Constant	-2.72	0.183	222.201	1	0	0.066
contar 3/3 (20-1)									<0,001#	<0,001		a Variable(s) entered on step 1: reducaoalimentar.
Não	81	91.0112	8	8.98876	89	3.143	1.225	8.063
Sim	350	96.9529	11	3.04709	361	1						Variables in the Equation
Incapaz	59	80.8219	14	19.1781	73	7.55	3.271	17.427						B	S.E.	Wald	df	Sig.	Exp(B)	95% C.I.for EXP(B)
higiene pessoal último mês						0.68	0.588	0.787	<0,001£	<0,001										Lower	Upper
0	73	80.2198	18	19.7802	91							Step 1a	difmastigacaodegluticao	2.148	0.581	13.664	1	0	8.571	2.744	26.778
5	417	96.5278	15	3.47222	432								Constant	-2.842	0.194	213.627	1	0	0.058
evacuar último mês						0.847	0.778	0.923	<0,001£	<0,001		a Variable(s) entered on step 1: difmastigacaodegluticao.
0	39	81.25	9	18.75	48
5	67	90.5405	7	9.45946	74							Variables in the Equation
10	384	95.7606	17	4.2394	401									B	S.E.	Wald	df	Sig.	Exp(B)	95% C.I.for EXP(B)
urinar último mês						0.831	0.761	0.907	<0,001£	<0,001										Lower	Upper
0	56	80	14	20	70							Step 1a	rebaixamentoconsciencia	2.73	0.59	21.378	1	0	15.333	4.82	48.779
5	129	94.8529	7	5.14706	136								Constant	-2.884	0.198	212.709	1	0	0.056
10	305	96.2145	12	3.78549	317							a Variable(s) entered on step 1: rebaixamentoconsciencia.
alimentar último mês						0.836	0.764	0.915	<0,001£	<0,001
0	26	78.7879	7	21.2121	33							Variables in the Equation
5	43	87.7551	6	12.2449	49									B	S.E.	Wald	df	Sig.	Exp(B)	95% C.I.for EXP(B)
10	421	95.4649	20	4.53515	441															Lower	Upper
uso do toilet						0.797	0.735	0.863	<0,001£	<0,001		Step 1a	jejum72horas	-18.524	13397.7	0	1	0.999	0	0	.
0	40	75.4717	13	24.5283	53								Constant	-2.679	0.18	221.696	1	0	0.069
5	40	86.9565	6	13.0435	46							a Variable(s) entered on step 1: jejum72horas.
10	409	96.6903	14	3.30969	423
15	1	100	0	0	1							Variables in the Equation
transferir último mês						0.853	0.804	0.904	<0,001£	<0,001				B	S.E.	Wald	df	Sig.	Exp(B)	95% C.I.for EXP(B)
0	27	79.4118	7	20.5882	34															Lower	Upper
5	29	76.3158	9	23.6842	38							Step 1a	diarreia	-18.519	15191.5	0	1	0.999	0	0	.
10	46	90.1961	5	9.80392	51								Constant	-2.684	0.18	222.442	1	0	0.068
15	388	97	12	3	400							a Variable(s) entered on step 1: diarreia.
mobilizar último mês						0.874	0.823	0.929	<0,001£	<0,001
0	26	78.7879	7	21.2121	33							Variables in the Equation
5	17	85	3	15	20									B	S.E.	Wald	df	Sig.	Exp(B)	95% C.I.for EXP(B)
10	73	89.0244	9	10.9756	82															Lower	Upper
15	374	96.3918	14	3.60825	388							Step 1a	DMrecemdiagnosticadodescomp	1.962	0.567	11.986	1	0.001	7.113	2.343	21.599
vestir último mês						0.826	0.759	0.899	<0,001£	<0,001			Constant	-2.837	0.194	212.95	1	0	0.059
0	37	80.4348	9	19.5652	46							a Variable(s) entered on step 1: DMrecemdiagnosticadodescomp.
5	63	87.5	9	12.5	72
10	389	96.2871	15	3.71287	404							Variables in the Equation
15	1	100	0	0	1									B	S.E.	Wald	df	Sig.	Exp(B)	95% C.I.for EXP(B)
escadas último mês						0.82	0.753	0.893	<0,001£	<0,001										Lower	Upper
0	41	77.3585	12	22.6415	53							Step 1a	nauseavomitos	3.452	1.239	7.764	1	0.005	31.548	2.784	357.548
5	90	92.7835	7	7.21649	97								Constant	-2.758	0.185	221.806	1	0	0.063
10	359	96.2466	14	3.75335	373							a Variable(s) entered on step 1: nauseavomitos.
banho último mês						0.721	0.624	0.834	<0,001£	<0,001
0	76	82.6087	16	17.3913	92							Variables in the Equation
5	413	96.0465	17	3.95349	430									B	S.E.	Wald	df	Sig.	Exp(B)	95% C.I.for EXP(B)
10	1	100	0	0	1															Lower	Upper
higiene pessoal atual						0.722	0.622	0.839	<0,001£	<0,001		Step 1a	Riscooupresençadehipoglicemia	0.809	0.372	4.719	1	0.03	2.245	1.082	4.659
0	138	86.25	22	13.75	160								Constant	-2.944	0.229	164.725	1	0	0.053
5	351	96.9613	11	3.03867	362							a Variable(s) entered on step 1: Riscooupresençadehipoglicemia.
10	1	100	0	0	1
evacuar atual						0.857	0.791	0.929	<0,001£	<0,001		Variables in the Equation
0	63	85.1351	11	14.8649	74									B	S.E.	Wald	df	Sig.	Exp(B)	95% C.I.for EXP(B)
5	65	89.0411	8	10.9589	73															Lower	Upper
10	362	96.2766	14	3.7234	376							Step 1a	cirurgiaextensa	0.061	1.051	0.003	1	0.954	1.062	0.135	8.337
urinar atual						0.874	0.804	0.949	<0,001£	0.001			Constant	-2.7	0.183	218.534	1	0	0.067
0	106	87.6033	15	12.3967	121							a Variable(s) entered on step 1: cirurgiaextensa.
5	112	93.3333	8	6.66667	120
10	272	96.4539	10	3.5461	282							Variables in the Equation
alimentar atual						0.799	0.732	0.874	<0,001£	<0,001				B	S.E.	Wald	df	Sig.	Exp(B)	95% C.I.for EXP(B)
0	28	80	7	20	35															Lower	Upper
5	65	83.3333	13	16.6667	78							Step 1a	politraumasepseventilacao	-18.513	20096.5	0	1	0.999	0	0	.
10	397	96.8293	13	3.17073	410								Constant	-2.69	0.18	223.558	1	0	0.068
uso do toilet						0.765	0.698	0.837	<0,001£	<0,001		a Variable(s) entered on step 1: politraumasepseventilacao.
0	53	74.6479	18	25.3521	71
5	111	94.0678	7	5.9322	118							Variables in the Equation
10	324	97.5904	8	2.40964	332									B	S.E.	Wald	df	Sig.	Exp(B)	95% C.I.for EXP(B)
15	2	100	0	0	2															Lower	Upper
transferir atual						0.806	0.753	0.863	<0,001£	<0,001		Step 1a	ulcera	1.281	0.438	8.536	1	0.003	3.6	1.524	8.502
0	36	78.2609	10	21.7391	46								Constant	-2.89	0.205	197.864	1	0	0.056
5	47	77.0492	14	22.9508	61							a Variable(s) entered on step 1: ulcera.
10	131	95.6204	6	4.37956	137
15	276	98.9247	3	1.07527	279							Variables in the Equation
mobilizar atual						0.858	0.807	0.912	<0,001£	<0,001				B	S.E.	Wald	df	Sig.	Exp(B)	95% C.I.for EXP(B)
0	43	78.1818	12	21.8182	55															Lower	Upper
5	25	96.1538	1	3.84615	26							Step 1a	alergiaalimentaroudietaepecífica	0.371	0.364	1.039	1	0.308	1.449	0.71	2.955
10	158	91.3295	15	8.67052	173								Constant	-2.894	0.275	111.131	1	0	0.055
15	264	98.1413	5	1.85874	269							a Variable(s) entered on step 1: alergiaalimentaroudietaepecífica.
vestir atual						0.785	0.714	0.863	<0,001£	<0,001
0	43	76.7857	13	23.2143	56							Variables in the Equation
5	152	92.6829	12	7.31707	164									B	S.E.	Wald	df	Sig.	Exp(B)	95% C.I.for EXP(B)
10	292	97.3333	8	2.66667	300															Lower	Upper
15	3	100	0	0	3							Step 1a	nutricaoenterealparenteral	0.862	0.782	1.215	1	0.27	2.367	0.511	10.958
escadas atual						0.783	0.709	0.865	<0,001£	<0,001			Constant	-2.734	0.185	217.502	1	0	0.065
0	73	80.2198	18	19.7802	91							a Variable(s) entered on step 1: nutricaoenterealparenteral.
5	175	95.1087	9	4.8913	184
10	242	97.5806	6	2.41935	248							Variables in the Equation
banho atual						0.774	0.665	0.902	<0,001£	0.001				B	S.E.	Wald	df	Sig.	Exp(B)	95% C.I.for EXP(B)
0	191	89.2523	23	10.7477	214															Lower	Upper
5	298	96.7532	10	3.24675	308							Step 1a	diamesano			20.558	2	0
10	1	100	0	0	1								diamesano(1)	0.645	0.477	1.831	1	0.176	1.907	0.749	4.856
Barthel_Cat_Previo						0.541	0.419	0.698	<0,001£	<0,001			diamesano(2)	1.907	0.427	19.92	1	0	6.73	2.913	15.548
Indica dependência total	32	80	8	20	40								Constant	-3.345	0.307	118.895	1	0	0.035
Grave dependência	40	81.6327	9	18.3673	49							a Variable(s) entered on step 1: diamesano.
Moderada dependência	97	93.2692	7	6.73077	104
Muito leve dependência	83	97.6471	2	2.35294	85							Variables in the Equation
Independência	238	97.1429	7	2.85714	245									B	S.E.	Wald	df	Sig.	Exp(B)	95% C.I.for EXP(B)
Barthel_Cat_Atual						0.386	0.268	0.557	<0,001£	<0,001										Lower	Upper
Indica dependência total	38	74.5098	13	25.4902	51							Step 1a	diadasemana			20.984	2	0
Grave dependência	84	88.4211	11	11.5789	95								diadasemana(1)	0.904	0.586	2.383	1	0.123	2.47	0.784	7.784
Moderada dependência	193	97.4747	5	2.52525	198								diadasemana(2)	1.817	0.397	20.948	1	0	6.154	2.826	13.399
Muito leve dependência	39	92.8571	3	7.14286	42								Constant	-3.256	0.263	153.074	1	0	0.039
Independência	136	99.2701	1	0.729927	137							a Variable(s) entered on step 1: diadasemana.
Cogn_cat						1.582	1.308	1.913	<0,001£	<0,001
Funcionamento mental normal	386	96.9849	12	3.01508	398							Variables in the Equation
Defeito cognitivo ligeiro	25	86.2069	4	13.7931	29									B	S.E.	Wald	df	Sig.	Exp(B)	95% C.I.for EXP(B)
Defeito cognitivo moderado	11	78.5714	3	21.4286	14															Lower	Upper
Defeito cognitivo grave	3	100	0	0	3							Step 1a	lugar			20.323	2	0
Incapaz de responder	65	82.2785	14	17.7215	79								lugar(1)	1.078	1.088	0.982	1	0.322	2.937	0.348	24.761
Total	490	93.6902	33	6.30975	523								lugar(2)	1.719	0.382	20.187	1	0	5.576	2.635	11.801
Teste qui-quadrado; * Teste exato de Fisher; # Teste da razão de verossimilhanças; £ Teste qui-quadrado de tendência													Constant	-3.157	0.241	172.077	1	0	0.043
												a Variable(s) entered on step 1: lugar.
												Variables in the Equation
														B	S.E.	Wald	df	Sig.	Exp(B)	95% C.I.for EXP(B)
																				Lower	Upper
												Step 1a	ndetelefone			25.393	2	0
													ndetelefone(1)	1.716	0.559	9.429	1	0.002	5.563	1.86	16.636
													ndetelefone(2)	1.926	0.403	22.867	1	0	6.864	3.117	15.118
													Constant	-3.365	0.272	153.213	1	0	0.035
												a Variable(s) entered on step 1: ndetelefone.
												Variables in the Equation
														B	S.E.	Wald	df	Sig.	Exp(B)	95% C.I.for EXP(B)
																				Lower	Upper
												Step 1a	idade_A			21.037	2	0
													idade_A(1)	1.183	0.792	2.227	1	0.136	3.263	0.69	15.42
													idade_A(2)	1.759	0.387	20.681	1	0	5.807	2.721	12.392
													Constant	-3.197	0.247	166.981	1	0	0.041
												a Variable(s) entered on step 1: idade_A.
												Variables in the Equation
														B	S.E.	Wald	df	Sig.	Exp(B)	95% C.I.for EXP(B)
																				Lower	Upper
												Step 1a	datadenascimento			20.198	2	0
													datadenascimento(1)	0.957	1.081	0.784	1	0.376	2.605	0.313	21.684
													datadenascimento(2)	1.716	0.382	20.131	1	0	5.563	2.629	11.773
													Constant	-3.155	0.241	171.803	1	0	0.043
												a Variable(s) entered on step 1: datadenascimento.
												Variables in the Equation
														B	S.E.	Wald	df	Sig.	Exp(B)	95% C.I.for EXP(B)
																				Lower	Upper
												Step 1a	presidenteatual			21.037	2	0
													presidenteatual(1)	1.183	0.792	2.227	1	0.136	3.263	0.69	15.42
													presidenteatual(2)	1.759	0.387	20.681	1	0	5.807	2.721	12.392
													Constant	-3.197	0.247	166.981	1	0	0.041
												a Variable(s) entered on step 1: presidenteatual.
												Variables in the Equation
														B	S.E.	Wald	df	Sig.	Exp(B)	95% C.I.for EXP(B)
																				Lower	Upper
												Step 1a	presidenteanterior			20.534	2	0
													presidenteanterior(1)	0.937	0.784	1.429	1	0.232	2.551	0.549	11.848
													presidenteanterior(2)	1.749	0.387	20.452	1	0	5.751	2.694	12.274
													Constant	-3.188	0.247	165.91	1	0	0.041
												a Variable(s) entered on step 1: presidenteanterior.
												Variables in the Equation
														B	S.E.	Wald	df	Sig.	Exp(B)	95% C.I.for EXP(B)
																				Lower	Upper
												Step 1a	nomesoltdamae			21.601	2	0
													nomesoltdamae(1)	1.202	0.665	3.269	1	0.071	3.326	0.904	12.237
													nomesoltdamae(2)	1.8	0.392	21.136	1	0	6.051	2.809	13.035
													Constant	-3.239	0.255	161.492	1	0	0.039
												a Variable(s) entered on step 1: nomesoltdamae.
												Variables in the Equation
														B	S.E.	Wald	df	Sig.	Exp(B)	95% C.I.for EXP(B)
																				Lower	Upper
												Step 1a	contar33201			22.496	2	0
													contar33201(1)	1.145	0.481	5.673	1	0.017	3.143	1.225	8.063
													contar33201(2)	2.022	0.427	22.437	1	0	7.55	3.271	17.427
													Constant	-3.46	0.306	127.678	1	0	0.031
												a Variable(s) entered on step 1: contar33201.
												Variables in the Equation
														B	S.E.	Wald	df	Sig.	Exp(B)	95% C.I.for EXP(B)
																				Lower	Upper
												Step 1a	higienepessoalúltimomês	-0.385	0.074	26.789	1	0	0.68	0.588	0.787
													Constant	-1.4	0.263	28.305	1	0	0.247
												a Variable(s) entered on step 1: higienepessoalúltimomês.
												Variables in the Equation
														B	S.E.	Wald	df	Sig.	Exp(B)	95% C.I.for EXP(B)
																				Lower	Upper
												Step 1a	evacuarúltimomês	-0.166	0.044	14.424	1	0	0.847	0.778	0.923
													Constant	-1.456	0.337	18.6	1	0	0.233
												a Variable(s) entered on step 1: evacuarúltimomês.
												Variables in the Equation
														B	S.E.	Wald	df	Sig.	Exp(B)	95% C.I.for EXP(B)
																				Lower	Upper
												Step 1a	urinarúltimomês	-0.185	0.045	17.071	1	0	0.831	0.761	0.907
													Constant	-1.553	0.288	29.035	1	0	0.212
												a Variable(s) entered on step 1: urinarúltimomês.
												Variables in the Equation
														B	S.E.	Wald	df	Sig.	Exp(B)	95% C.I.for EXP(B)
																				Lower	Upper
												Step 1a	alimentarúltimomês	-0.179	0.046	15.065	1	0	0.836	0.764	0.915
													Constant	-1.24	0.382	10.519	1	0.001	0.289
												a Variable(s) entered on step 1: alimentarúltimomês.
												Variables in the Equation
														B	S.E.	Wald	df	Sig.	Exp(B)	95% C.I.for EXP(B)
																				Lower	Upper
												Step 1a	usodotoilet	-0.227	0.041	30.693	1	0	0.797	0.735	0.863
													Constant	-1.055	0.3	12.378	1	0	0.348
												a Variable(s) entered on step 1: usodotoilet.
												Variables in the Equation
														B	S.E.	Wald	df	Sig.	Exp(B)	95% C.I.for EXP(B)
																				Lower	Upper
												Step 1a	transferirúltimomês	-0.159	0.03	28.485	1	0	0.853	0.804	0.904
													Constant	-0.934	0.329	8.031	1	0.005	0.393
												a Variable(s) entered on step 1: transferirúltimomês.
												Variables in the Equation
														B	S.E.	Wald	df	Sig.	Exp(B)	95% C.I.for EXP(B)
																				Lower	Upper
												Step 1a	mobilizarúltimomês	-0.135	0.031	18.984	1	0	0.874	0.823	0.929
													Constant	-1.136	0.363	9.824	1	0.002	0.321
												a Variable(s) entered on step 1: mobilizarúltimomês.
												Variables in the Equation
														B	S.E.	Wald	df	Sig.	Exp(B)	95% C.I.for EXP(B)
																				Lower	Upper
												Step 1a	vestirúltimomês	-0.191	0.043	19.471	1	0	0.826	0.759	0.899
													Constant	-1.278	0.328	15.144	1	0	0.279
												a Variable(s) entered on step 1: vestirúltimomês.
												Variables in the Equation
														B	S.E.	Wald	df	Sig.	Exp(B)	95% C.I.for EXP(B)
																				Lower	Upper
												Step 1a	escadasúltimomês	-0.199	0.044	20.689	1	0	0.82	0.753	0.893
													Constant	-1.323	0.308	18.41	1	0	0.266
												a Variable(s) entered on step 1: escadasúltimomês.
												Variables in the Equation
														B	S.E.	Wald	df	Sig.	Exp(B)	95% C.I.for EXP(B)
																				Lower	Upper
												Step 1a	banhoúltimomês	-0.327	0.074	19.535	1	0	0.721	0.624	0.834
													Constant	-1.558	0.275	32.096	1	0	0.211
												a Variable(s) entered on step 1: banhoúltimomês.
												Variables in the Equation
														B	S.E.	Wald	df	Sig.	Exp(B)	95% C.I.for EXP(B)
																				Lower	Upper
												Step 1a	higienepessoalatual	-0.326	0.076	18.132	1	0	0.722	0.622	0.839
													Constant	-1.836	0.23	63.99	1	0	0.159
												a Variable(s) entered on step 1: higienepessoalatual.
												Variables in the Equation
														B	S.E.	Wald	df	Sig.	Exp(B)	95% C.I.for EXP(B)
																				Lower	Upper
												Step 1a	evacuaratual	-0.154	0.041	14.095	1	0	0.857	0.791	0.929
													Constant	-1.643	0.297	30.513	1	0	0.193
												a Variable(s) entered on step 1: evacuaratual.
												Variables in the Equation
														B	S.E.	Wald	df	Sig.	Exp(B)	95% C.I.for EXP(B)
																				Lower	Upper
												Step 1a	urinaratual	-0.135	0.042	10.155	1	0.001	0.874	0.804	0.949
													Constant	-1.957	0.261	56.294	1	0	0.141
												a Variable(s) entered on step 1: urinaratual.
												Variables in the Equation
														B	S.E.	Wald	df	Sig.	Exp(B)	95% C.I.for EXP(B)
																				Lower	Upper
												Step 1a	alimentaratual	-0.224	0.045	24.369	1	0	0.799	0.732	0.874
													Constant	-1.009	0.343	8.656	1	0.003	0.365
												a Variable(s) entered on step 1: alimentaratual.
												Variables in the Equation
														B	S.E.	Wald	df	Sig.	Exp(B)	95% C.I.for EXP(B)
																				Lower	Upper
												Step 1a	usodotoilet_A	-0.268	0.046	33.357	1	0	0.765	0.698	0.837
													Constant	-1.155	0.262	19.378	1	0	0.315
												a Variable(s) entered on step 1: usodotoilet_A.
												Variables in the Equation
														B	S.E.	Wald	df	Sig.	Exp(B)	95% C.I.for EXP(B)
																				Lower	Upper
												Step 1a	transferiratual	-0.216	0.035	38.565	1	0	0.806	0.753	0.863
													Constant	-0.835	0.284	8.645	1	0.003	0.434
												a Variable(s) entered on step 1: transferiratual.
												Variables in the Equation
														B	S.E.	Wald	df	Sig.	Exp(B)	95% C.I.for EXP(B)
																				Lower	Upper
												Step 1a	mobilizaratual	-0.153	0.031	23.967	1	0	0.858	0.807	0.912
													Constant	-1.25	0.299	17.428	1	0	0.287
												a Variable(s) entered on step 1: mobilizaratual.
												Variables in the Equation
														B	S.E.	Wald	df	Sig.	Exp(B)	95% C.I.for EXP(B)
																				Lower	Upper
												Step 1a	vestiratual	-0.242	0.049	24.802	1	0	0.785	0.714	0.863
													Constant	-1.244	0.29	18.364	1	0	0.288
												a Variable(s) entered on step 1: vestiratual.
												Variables in the Equation
														B	S.E.	Wald	df	Sig.	Exp(B)	95% C.I.for EXP(B)
																				Lower	Upper
												Step 1a	escadasatual	-0.245	0.051	23.258	1	0	0.783	0.709	0.865
													Constant	-1.488	0.255	34.061	1	0	0.226
												a Variable(s) entered on step 1: escadasatual.
												Variables in the Equation
														B	S.E.	Wald	df	Sig.	Exp(B)	95% C.I.for EXP(B)
																				Lower	Upper
												Step 1a	banhoatual	-0.256	0.078	10.806	1	0.001	0.774	0.665	0.902
													Constant	-2.116	0.221	92.015	1	0	0.12
												a Variable(s) entered on step 1: banhoatual.
												Variables in the Equation
														B	S.E.	Wald	df	Sig.	Exp(B)	95% C.I.for EXP(B)
																				Lower	Upper
												Step 1a	Barthel_Cat_Previo	-0.615	0.13	22.311	1	0	0.541	0.419	0.698
													Constant	-0.636	0.414	2.364	1	0.124	0.529
												a Variable(s) entered on step 1: Barthel_Cat_Previo.
												Variables in the Equation
														B	S.E.	Wald	df	Sig.	Exp(B)	95% C.I.for EXP(B)
																				Lower	Upper
												Step 1a	Barthel_Cat_Atual	-0.952	0.187	26.014	1	0	0.386	0.268	0.557
													Constant	-0.207	0.438	0.223	1	0.637	0.813
												a Variable(s) entered on step 1: Barthel_Cat_Atual.
												Variables in the Equation
														B	S.E.	Wald	df	Sig.	Exp(B)	95% C.I.for EXP(B)
																				Lower	Upper
												Step 1a	Cogn_cat	0.459	0.097	22.381	1	0	1.582	1.308	1.913
													Constant	-3.73	0.332	126.549	1	0	0.024
												a Variable(s) entered on step 1: Cogn_cat.
												Variables in the Equation
														B	S.E.	Wald	df	Sig.	Exp(B)	95% C.I.for EXP(B)		Sig.
																				Lower	Upper
												Step 1a	Idade	0.052	0.019	7.593	1	0.006	1.053	1.015	1.093	0.006
													Constant	-6.71	1.506	19.853	1	0	0.001			0
												a Variable(s) entered on step 1: Idade.
												Variables in the Equation
														B	S.E.	Wald	df	Sig.	Exp(B)	95% C.I.for EXP(B)		Sig.
																				Lower	Upper
												Step 1a	numerodediagnosticos	0.161	0.112	2.072	1	0.15	1.175	0.943	1.464	0.15
													Constant	-3.21	0.414	60.009	1	0	0.04			0
												a Variable(s) entered on step 1: numerodediagnosticos.
												Variables in the Equation
														B	S.E.	Wald	df	Sig.	Exp(B)	95% C.I.for EXP(B)		Sig.
																				Lower	Upper
												Step 1a	hemoglobina	-0.227	0.092	6.111	1	0.013	0.797	0.666	0.954	0.013
													Constant	0.07	1.102	0.004	1	0.95	1.072			0.95
												a Variable(s) entered on step 1: hemoglobina.
												Variables in the Equation
														B	S.E.	Wald	df	Sig.	Exp(B)	95% C.I.for EXP(B)		Sig.
																				Lower	Upper
												Step 1a	ndemedicacoes	0.067	0.042	2.569	1	0.109	1.07	0.985	1.162	0.109
													Constant	-3.135	0.344	83.095	1	0	0.044			0
												a Variable(s) entered on step 1: ndemedicacoes.
												Variables in the Equation
														B	S.E.	Wald	df	Sig.	Exp(B)	95% C.I.for EXP(B)		Sig.
																				Lower	Upper
												Step 1a	ndeinternacoes6meses	0.144	0.135	1.132	1	0.287	1.154	0.886	1.504	0.287
													Constant	-2.816	0.219	165.92	1	0	0.06			0
												a Variable(s) entered on step 1: ndeinternacoes6meses.
												Variables in the Equation
														B	S.E.	Wald	df	Sig.	Exp(B)	95% C.I.for EXP(B)		Sig.
																				Lower	Upper
												Step 1a	difBarthel	0.017	0.01	3.129	1	0.077	1.017	0.998	1.037	0.077
													Constant	-2.909	0.229	161.729	1	0	0.055
												a Variable(s) entered on step 1: difBarthel.
[truncated: 49 more columns]
